# Supplementary material for: Catalysis of a 1,3-dipolar reaction by distorted DNA incorporating a heterobimetallic platinum(ii) and copper(ii) complex
Source: PubMed Central journal article supplement (PMC5637124; doi:10.1039/c7sc02311a), 2017-08-22
Supplement: SC-008-C7SC02311A-s001.pdf [file SC-008-C7SC02311A-s001.pdf]

## Catalysis of a 1,3-Dipolar Reaction by Distorted DNA Incorporating a Heterobimetallic Platinum (II) and Copper (II)

### Electronic Supplementary Information

Iván Rivilla<sup>a</sup>, Abel de Cózar<sup>a,b</sup>, Thomas Schäfer<sup>b,c</sup>, Frank J. Hernandez<sup>c</sup>, Alexander M. Bittner<sup>b,d</sup>, Aitziber Eleta-Lopez<sup>d</sup>, Ali Aboudzadeh,<sup>c</sup> José I. Santos<sup>e</sup>, José I. Miranda<sup>e</sup> and  
Fernando P. Cossío<sup>a,\*</sup>

<sup>a</sup> Department of Organic Chemistry I, Centro de Innovación en Química Avanzada (ORFEO-CINQA), Universidad del País Vasco/Euskal Herriko Unibertsitatea (UPV/EHU) and Donostia International Physics Center (DIPC). P<sup>o</sup> Manuel Lardizabal 3, E-20018 Donostia/San Sebastián, Spain.

<sup>b</sup> Ikerbasque, Basque Foundation for Science M<sup>o</sup> Díaz de Haro 3, E-48013 Bilbao, Spain.

<sup>c</sup> NanoBioSeparations Group, POLYMAT University of the Basque Country (UPV/EHU). Avda. Tolosa 72, E-2018 Donostia/San Sebastián, Spain.

<sup>d</sup> CIC NanoGUNE Consolider. Tolosa Hiribidea, 76, E-200018 Donostia/san Sebastián, Spain.

<sup>e</sup> SGIker NMR Facility. Universidad del País Vasco/Euskal Herriko Unibertsitatea (UPV/EHU). Avda. Tolosa 72, E-20018 Donostia/San Sebastián, Spain.

## Contents

|                                                                               |     |
|-------------------------------------------------------------------------------|-----|
| Commercially available reagents and solvents.....                             | S3  |
| Table S1. Control experiments for the <b>3a+4a</b> → <b>5aa</b> reaction..... | S3  |
| Computational methods and results.....                                        | S4  |
| NMR data of <b>1a</b> and cycloadducts <b>5aa-bf</b> .....                    | S8  |
| Copies of NMR spectra .....                                                   | S11 |
| ORTEP diagram of cycloadducts <b>5bb</b> and <b>5bf</b> .....                 | S19 |
| Cartesian coordinates of the QM partition of stationary points.....           | S20 |
| References for Supplementary Information.....                                 | S46 |

## Commercially available reagents and solvents

Guanosine 5'-monophosphate disodium salt hydrate,  $K_2[PtCl_4]$ , Lambda phage DNA, methylated from *Escherichia coli* host strain W3110 lyophilized powder, copper(II) trifluoromethanesulfonate, deoxyribonucleic acid sodium salt from salmon testes, *N*-pheylnmaleimide and *N*-methylmaleimide, were purchased from Sigma-Aldrich and stored under appropriate conditions. Dichloromethane was purchased from Lab-Scan. 2,2'-Bipyrimidine was purchased from Alfa Aesar. Triethylamine and DMSO were purchased from Panreac. Hexane and Ethyl Acetate for chromatography column were purchased from Scharlab.

**Table S1.** Control experiments for the **3a+4a** → **5aa** reaction (See Scheme 2 of the main text).

| Entry | Bipym <sup>a</sup>             | PtCl <sub>2</sub>              | Cu(OTf) <sub>2</sub> | TEA <sup>b</sup> | DNA <sup>c</sup> | Result <sup>d</sup>     |
|-------|--------------------------------|--------------------------------|----------------------|------------------|------------------|-------------------------|
| 1     | --                             | --                             | --                   | --               | --               | n. r.                   |
| 2     | Yes                            | --                             | --                   | --               | --               | n. r.                   |
| 3     | --                             | Yes                            | --                   | --               | --               | n. r.                   |
| 4     | --                             | --                             | Yes                  | --               | --               | n. r.                   |
| 5     | --                             | --                             | --                   | Yes              | --               | n. r.                   |
| 6     | --                             | --                             | --                   | --               | Yes              | n. r.                   |
| 7     | Yes ( <b>1a</b> ) <sup>e</sup> | Yes ( <b>1a</b> ) <sup>e</sup> | --                   | --               | --               | n. r.                   |
| 8     | Yes ( <b>1a</b> ) <sup>e</sup> | Yes ( <b>1a</b> ) <sup>e</sup> | Yes                  | --               | --               | n. r.                   |
| 9     | Yes ( <b>1a</b> ) <sup>e</sup> | Yes ( <b>1a</b> ) <sup>e</sup> | Yes                  | Yes              | --               | n. r.                   |
| 10    | Yes ( <b>1a</b> ) <sup>e</sup> | Yes ( <b>1a</b> ) <sup>e</sup> | Yes                  | Yes              | Yes              | <b>5aa</b> <sup>f</sup> |
| 11    | Yes                            | --                             | Yes                  | --               | --               | n. r.                   |
| 12    | Yes                            | --                             | Yes                  | Yes              | --               | n. r.                   |
| 13    | Yes                            | --                             | Yes                  | Yes              | Yes              | n. r.                   |
| 14    | --                             | Yes                            | --                   | --               | Yes              | n. r.                   |
| 15    | --                             | Yes                            | Yes                  | Yes              | Yes              | n. r.                   |
| 16    | --                             | --                             | Yes                  | --               | Yes              | n. r.                   |
| 17    | --                             | --                             | Yes                  | Yes              | Yes              | n. r.                   |
| 18    | --                             | --                             | --                   | Yes              | Yes              | n. r.                   |

<sup>a</sup>Bipym: 2,2'-bipyrimidine. <sup>b</sup>TEA: triethylamine. <sup>c</sup>Salmon sperm DNA. <sup>d</sup>n. r.: no (3+2) cycloaddition leading to **5aa** was observed after 6 days of reaction at room temperature. <sup>e</sup>The reaction was carried out with previously formed complex **1a**. <sup>f</sup>Formation of racemic (3+2) *endo*-cycloadduct **5aa** was observed (see Table 1 of the main text).

## Computational results

The X-ray structure of double stranded oligodeoxynucleotide complex d(CCTCTG\*G\*TCTCC)-d(GGAGACCAGAGG) (pdb code: 1aio), was chosen as starting point. The high level DFT layer of the ONIOM calculations included N-methyl maleimide, 2,2'-bipyrimidine and **4a** as well as Cu(II) and Pt(II) cations. Only the guanine units directly connected to the Pt(II) atom were included in the high level layer, whereas all the remaining nucleotides of the DNA helix were considered in the low MM layer. In addition, 22 Na(+1) cations and 509 discrete water molecules were introduced in the low level layer in order to stabilize the whole system (See Figure S1). Preliminary calculations showed that this explicit environment was required to avoid a collapse of the system during the optimization process.

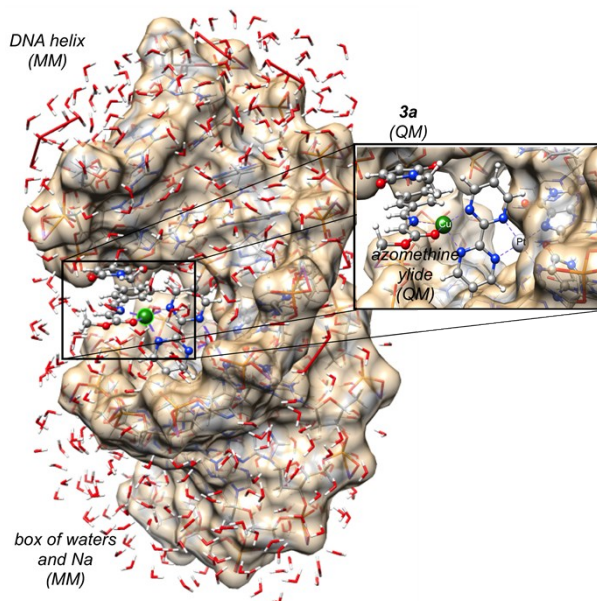

**Figure S1.** Representation of the different layers used in the ONIOM calculations of *endo*-RC. High (QM) and low (MM) level atoms in the ONIOM partitions are represented as ball & stick and tube models respectively. Water molecules and Na(+) cations, treated at the MM level, are represented in wire mode.

In the initial part of the computational study, the structure of azomethine ylide **INT2** was analyzed. Because of the pseudo-tetrahedral environment of the copper atom, two possible conformers **INT2** and **INT2'** were considered. The calculations showed a clear preference of **INT2** over its **INT2'** counterpart. Single-point calculations of the backbone reflected an energetic difference of ca. 2 kcal mol<sup>-1</sup>, which suggested that intensive exploration of the possible conformers should result in closer energies for both configurations.

In order to avoid misleading results on the computed activation energies, we ensured that reactive, transition structures and products presented a similar water environment along the possible reaction coordinates. Therefore, only reactive and

product complexes directly connected via the corresponding transition structures by intrinsic reaction coordinate (IRC) calculations were considered.

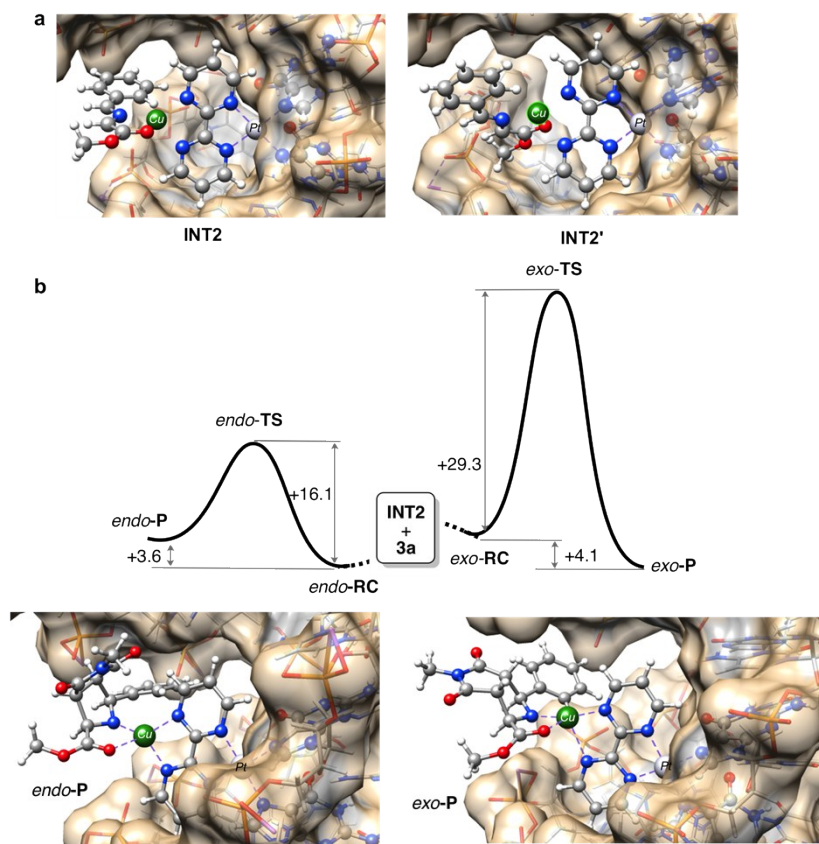

**Figure S2.** (a) Fully optimized geometries of azomethine ylides **INT2** and **INT2'**. (b) Reaction profiles associated with the (3+2) cycloaddition of **INT2** and **3a**. Calculations were performed at the B3LYP/LanL2DZ:UFF level of theory. Relative energies are in kcal mol<sup>-1</sup> and were obtained from data reported in Table S2.

In addition, in order to verify the effectiveness of the DNA-catalytic system developed, we computed the activation barriers associated with two different model systems without the DNA scaffold. In the first system we considered the azomethine ylide coordinated to copper and bipyridine as reactive system (Figure S3a). The second model system also includes diaqua platinum in the catalytic system (Figure S3b). In both models, the system was solvated by a box of MM water molecules, and *endo*- and *exo*- approaches were considered.

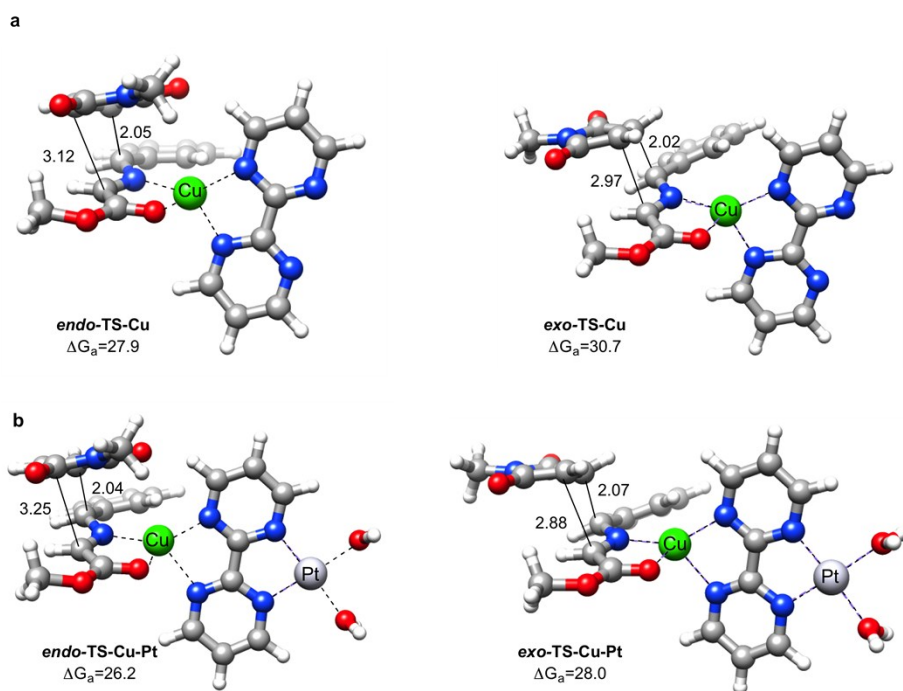

**Figure S3.** (a) Fully optimized geometries of transition structures associated with the *endo*- and *exo*- (3+2) cycloadditions between azomethine ylide associated with imine 4a and N-methyl maleimide in the presence of the Cu(II)-bipym complex. (b) Same as (a) but with an additional Pt(II)(H<sub>2</sub>O)<sub>2</sub> unit. Calculations were performed at the B3LYP/LanL2DZ:UFF level of theory. Activation energies are given in kcal mol<sup>-1</sup> and were obtained from data reported in Table S3.

Our calculations show that in both cases, the computed activation barriers are higher than those computed for the DNA-catalytic system. In addition, the *exo* approaches are disfavored compared to their *endo*- counterparts, as it occurred in the presence of DNA.

**Table S2.** Total electronic energies<sup>a</sup> (E, in a.u.), zero point vibrational energies<sup>b</sup> (ZPVE, in a. u.), Thermal corrections to Gibbs free energies<sup>c</sup> (TCGFE, in a.u.), and number of imaginary frequencies<sup>d</sup> (NIMAG) of all the stationary points included in figure S2.

| Structure      | E                                           | ZPVE      | TCGFE     | NIMAG( $\nu$ ) |
|----------------|---------------------------------------------|-----------|-----------|----------------|
| <b>INT2</b>    | -2515.199041<br>(-2509.473451) <sup>d</sup> | 31.880089 | 24.277696 | 0              |
| <b>INT2'</b>   | -2514.684528<br>(-2509.469457) <sup>d</sup> | 31.844412 | 24.244623 | 0              |
| <b>endo-RC</b> | -2913.610189                                | 18.347023 | 14.505919 | 1 (-4.0716)    |
| <b>exo-RC</b>  | -2916.603381                                | 18.314116 | 14.407497 | 0              |
| <b>endo-P</b>  | -2913.608963                                | 18.351548 | 14.516041 | 0              |
| <b>exo-P</b>   | -2916.613338                                | 18.317510 | 14.409977 | 0              |
| <b>endo-TS</b> | -2913.585204                                | 18.347673 | 14.509305 | 1 (-347.8835)  |
| <b>exo-TS</b>  | -2916.578814                                | 18.336136 | 14.476855 | 1 (-342.8258)  |

<sup>a</sup>Computed at the ONIOM(B3LYP/LANL2DZ:UFF) level. <sup>b,c</sup>Computed at 298.15 K at the ONIOM(B3LYP/LANL2DZ:UFF) level. <sup>d</sup>If NIMAG=1, the imaginary frequency  $\nu$  (in parentheses) is given in  $\text{cm}^{-1}$ . <sup>e</sup>Single point without considering the water + Na environment.

**Table S3.** Total electronic energies<sup>a</sup> (E, in a.u.), zero point vibrational energies<sup>b</sup> (ZPVE, in a. u.), thermal corrections to Gibbs free energies<sup>c</sup> (TCGFE, in a.u.), and number of imaginary frequencies<sup>d</sup> (NIMAG) of all the stationary points included in Figure S3.

| Structure                    | E            | ZPVE     | TCGFE    | NIMAG( $\nu$ ) |
|------------------------------|--------------|----------|----------|----------------|
| <b>endo-RC-(Cu-bipym)</b>    | -1714.524234 | 2.730927 | 1.947269 | 0              |
| <b>exo-RC-(Cu-bipym)</b>     | -1714.522641 | 2.687094 | 1.917426 | 0              |
| <b>endo-P-(Cu-bipym)</b>     | -1714.535620 | 2.738420 | 1.965040 | 0              |
| <b>exo-P-(Cu-bipym)</b>      | -1714.535751 | 2.693210 | 1.931002 | 0              |
| <b>endo-TS-(Cu-bipym)</b>    | -1714.486532 | 2.731979 | 1.954134 | 1 (-559.7746)  |
| <b>exo-TS-(Cu-bipym)</b>     | -1714.473720 | 2.686365 | 1.917462 | 1 (-562.5817)  |
| <b>endo-RC-(Cu-Pt-bipym)</b> | -1985.946639 | 3.215388 | 2.292364 | 0              |
| <b>exo-RC-(Cu-Pt-bipym)</b>  | -1985.854892 | 3.184986 | 2.189465 | 0              |
| <b>endo-P-(Cu-Pt-bipym)</b>  | -1985.939321 | 3.220902 | 2.311317 | 0              |
| <b>exo-P-(Cu-Pt-bipym)</b>   | -1985.920086 | 3.198087 | 2.297976 | 0              |
| <b>endo-TS-(Cu-Pt-bipym)</b> | -1985.907092 | 3.215253 | 2.294630 | 1 (-590.8853)  |
| <b>exo-TS-(Cu-Pt-bipym)</b>  | -1985.890064 | 3.178444 | 2.269281 | 1 (-540.7704)  |

<sup>a</sup>Computed at the ONIOM(B3LYP/LANL2DZ:UFF) level. <sup>b,c</sup>Computed at 298.15 K at the ONIOM(B3LYP/LANL2DZ:UFF) level. <sup>d</sup>If NIMAG=1, the imaginary frequency  $\nu$  (in parentheses) is given in  $\text{cm}^{-1}$ .

**Table S4.** NMR data of **1a** and selected derivatives shown in Figure 2 of the main text.

| Compound                                                                                         | Nucleus         | $\delta$ (ppm)                                                                                                                                                                    |
|--------------------------------------------------------------------------------------------------|-----------------|-----------------------------------------------------------------------------------------------------------------------------------------------------------------------------------|
| 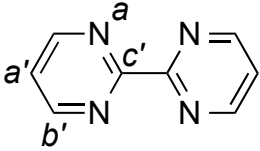                | $^{15}\text{N}$ | 106.18 (a)                                                                                                                                                                        |
|                                                                                                  | $^{13}\text{C}$ | 123.63 (a'); 153.67 (b'); 158.86 (c')                                                                                                                                             |
| <b>1a</b>       | $^{15}\text{N}$ | 106.26 (b); 109.96 (a)                                                                                                                                                            |
|                                                                                                  | $^{13}\text{C}$ | 124.0 (a'); 149.94, 152.87* (d'); 154.52, 157.51* (c'), 157.29, 161.39* (b')                                                                                                      |
| <b>5'-GMP</b>  | $^{15}\text{N}$ | 65.61 (NH <sub>2</sub> ); 145.52 (NH); 149.08 (N3); 159.14 (N7); 164.48 (N9)                                                                                                      |
|                                                                                                  | $^{13}\text{C}$ | 64.37, 63.38* (5'); 71.80, 70.89* (2'); 77.21, 76.35* (3'); 82.91 (4'); 85.84, 84.71* (1'); 113.89 (4); 136.01, 137.67* (8), 149.35, 150.05* (5); 153.28 (2); 154.16, 157.56* (6) |
| <b>6</b>      | $^{15}\text{N}$ | 75.74 (NH <sub>2</sub> ); 106.48 (b); 109.53 (a); 137.05 (NH); 160.02 (N3); 167.24 (N9); 222.73 (N7)                                                                              |
|                                                                                                  | $^{13}\text{C}$ | 62.59 (5'); 71.80, 70.81 (2'); 74.61 (3'); 83.21 (4'); 87.98 (1'); 112.80, 113.93* (4); 123.65, (a'), 124.58* (a'), 134.97 (8) (5); 139.25 (5); 151.02 (2), 159.09 (6)            |

- Signals associated with presence of different conformers in solid state.



In the  $^{13}\text{C}$  MAS-NMR spectrum of **5'GMP** all the signals were duplicated due to the existence of two conformers. The assignment of the signals was performed according to previously published work.<sup>1</sup> Davis et al.<sup>2</sup> Proposed that Guanosine interacts with  $\text{K}^+$  and  $\text{Cs}^+$  giving rise to only the *cis* conformer. It is noticeable that the *anti* conformer is supposed to be the major one in the solid state. Our results shown that the reaction of Guanosine with  $\text{Pt}(\text{bipym})\text{Cl}_2$  implies a shift of the C8 and C1' signals to higher fields due to interactions of the former compound with the metallic centre. Moreover, the duplicity of the Guanosine signals on the MAS-NMR spectra disappear when  $\text{Pt}(\text{bipym})\text{Cl}_2$  **1a** was added. From these data we propose that the rotational freedom about N9-C1' is broken due to the metal coordination. Therefore, only one of the conformers can be formed.

#### Characterization data for cycloadducts **5aa-bf**.

The  $^1\text{H}$ -NMR data for compounds **5aa-bf** were in good agreement with those reported in the literature.<sup>3,4</sup>

**Methyl 5-methyl-4,6-dioxo-3-phenyloctahydropyrrolo[3,4-c]pyrrole-1-carboxylate (5aa):** White solid, 3.02 mg, yield 21 %.  $^1\text{H}$  NMR (400 MHz, Chloroform-*d*)  $\delta$  7.38 (bs, 5H) 4.53 (d,  $J = 8.6$  Hz, 1H), 4.09 (d,  $J = 6.8$  Hz, 1H), 3.91 (s, 3H), 3.60 (d,  $J = 7.2$  Hz, 1H), 3.47 (t,  $J = 8.1$  Hz, 1H), 2.91 (s, 3H) 2.45 (s, 1H).

**Methyl 4,6-dioxo-3,5-diphenyloctahydropyrrolo[3,4-c]pyrrole-1-carboxylate (5ba):** White solid, 6.04mg, yield 37%.  $^1\text{H}$  NMR (400 MHz, Chloroform-*d*)  $\delta$  7.58 – 7.33 (m, 4H), 7.18-7.15 (m, 2H), 7.08 (t,  $J = 8.4$  Hz, 2H), 4.63 (d,  $J = 8.8$  Hz, 1H), 4.17 (d,  $J = 6.6$  Hz, 1H), 3.90 (s, 3H), 3.75 (t,  $J = 7.2$  Hz, 1H), 3.59 (t,  $J = 8.3$  Hz, 1H), 2.55 (s, 1H)

**Methyl 5-(4-methoxyphenyl)-4,6-dioxo-3-phenyloctahydropyrrolo[3,4-c]pyrrole-1-carboxylate (5ca):** White solid, 3.84 mg, yield 20 %.  $^1\text{H}$  NMR (400 MHz, Chloroform-*d*)  $\delta$  7.47 (d,  $J = 7.4$  Hz, 2H), 7.37 (m, 2H), 7.09 (d,  $J = 8.5$  Hz, 2H), 6.92 (dd,  $J = 8.5$  Hz, 2H), 4.64 (d,  $J = 8.8$  Hz, 1H), 4.17 (d,  $J = 6.7$  Hz, 1H), 3.90 (s, 3H), 3.81 (s, 3H), 3.74 (t,  $J = 7.2$  Hz, 1H), 3.58 (t,  $J = 8.3$  Hz, 1H) 2.55 (bs, 1H).

**Methyl 4,6-dioxo-5-phenyl-3-(p-tolyl)octahydropyrrolo[3,4-c]pyrrole-1-carboxylate, 5bb:** White solid, 4.19 mg, yield 23 %.  $^1\text{H}$  NMR (400 MHz, Chloroform-*d*)  $\delta$  7.44-7.35 (m, 5H), 7.19 (d,  $J = 7.73$  Hz, 2H, ), 6.91 (d,  $J = 8.01$  Hz, 2H), 4.59 (d,  $J = 8.7$  Hz, 1H), 4.15 (d,  $J = 6.7$  Hz, 1H), 3.90 (s, 3H), 3.82 (s, 3H), 3.74 (t,  $J = 7.3$  Hz, 3H), 3.54 (t,  $J = 8.3$  Hz, 1H), 2.50 (s, 1H).

**Methyl 3-(4-methoxyphenyl)-4,6-dioxo-5-phenyloctahydropyrrolo[3,4-c]pyrrole-1-carboxylate (5bc):** White solid, 6.65 mg, yield 35 %.  $^1\text{H}$  NMR (400 MHz, Chloroform-*d*)  $\delta$  7.46-7.35 (m, 4H), 7.19 (d,  $J = 7.8$  Hz, 2H), 6.91 (d,  $J = 8.2$  Hz, 2H), 4.59 (d,  $J = 8.8$  Hz,

1H), 4.15 (d,  $J = 6.6$  Hz, 1H), 3.90 (s, 3H), 3.82 (s, 3H), 3.74 (t,  $J = 7.2$  Hz, 1H), 3.54 (t,  $J = 8.3$  Hz, 1H), 2.50 (s, 1H).

**Methyl 3-(4-fluorophenyl)-4,6-dioxo-5-phenyloctahydropyrrolo[3,4-c]pyrrole-1-carboxylate (5bd):** White solid, 4.78 mg, yield 26 %.  $^1\text{H}$  NMR (400 MHz, Chloroform-*d*)  $\delta$  7.50 – 7.42 (m, 4H), 7.37 (d,  $J = 7.7$  Hz, 2H), 7.17 (m, 2H), 7.08 (t,  $J = 8.5$  Hz, 2H), 4.62 (d,  $J = 8.7$  Hz, 1H), 4.17 (d,  $J = 6.6$  Hz, 1H), 3.90 (s, 3H), 3.74 (t,  $J = 7.2$  Hz, 1H), 3.57 (t,  $J = 8.4$  Hz, 1H), 2.52 (s, 1H).

**methyl 3-cyclohexyl-4,6-dioxo-5-phenyloctahydropyrrolo[3,4-c]pyrrole-1-carboxylate (5be):** White solid, 5.47mg, yield 32 %.  $^1\text{H}$  NMR (400 MHz, Chloroform-*d*)  $\delta$  7.49 (m, 2H), 7.49 (m, 1H), 7.31 – 7.27 (dt, 1H,  $J = 7.2$  Hz, 2H), 4.09 (d,  $J = 6.5$  Hz, 1H), 3.92 (s, 3H), 3.73 (d,  $J = 7.2$  Hz, 1H), 3.58 (t,  $J = 8.3$  Hz, 1H) 3.07 (m, 1H), 2.48 (m, 1H) 2.04 (m, 1H), 1.82 (m,4H), 1.24 (m, 4H).

**Methyl 4,6-dioxo-5-phenyl-3-(thiophen-2-yl)octahydropyrrolo[3,4-c]pyrrole-1-carboxylate (5bf):** White solid, 4.81 mg, yield 27 %.  $^1\text{H}$  NMR (400 MHz, Chloroform-*d*)  $\delta$  7.44-7.32 (m, 1H), 7.26-7.15 (m, 3H), 7.02 (d,  $J = 7.25$  Hz), 4.91 (d,  $J = 8.6$  Hz, 1H), 4.12 (d,  $J = 6.2$  Hz, 1H), 3.86 (s, 3H), 3.73 (t,  $J = 7.2$  Hz, 1H), 3.55 (t,  $J = 8.7$  Hz, 1H), 2.72 (s, 1H)

## Copies of NMR spectra

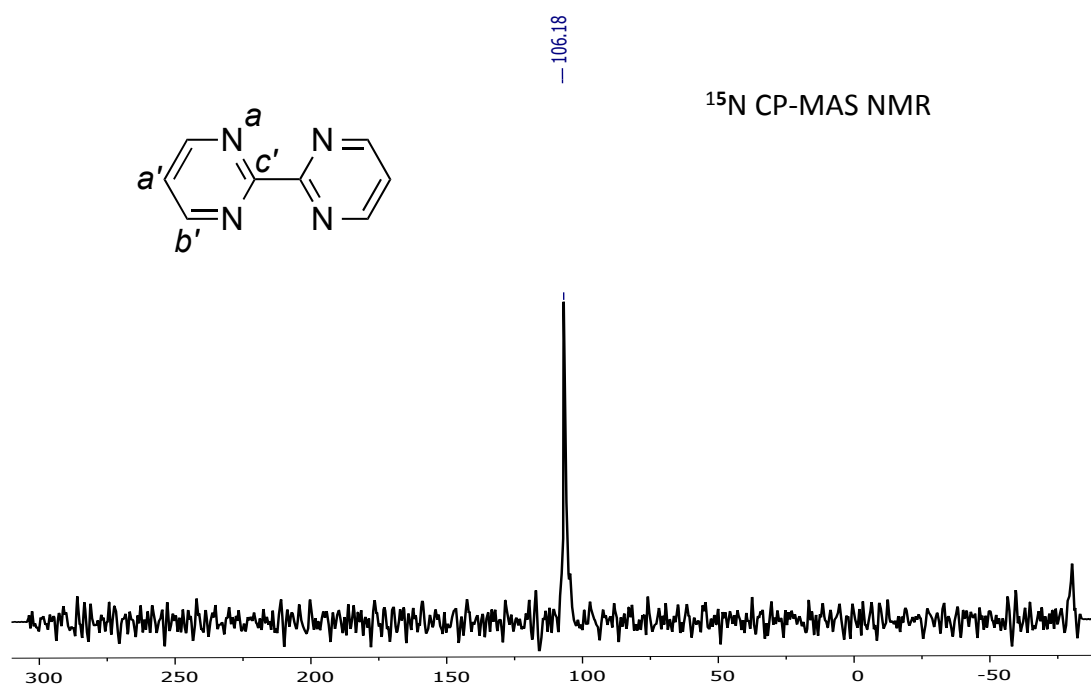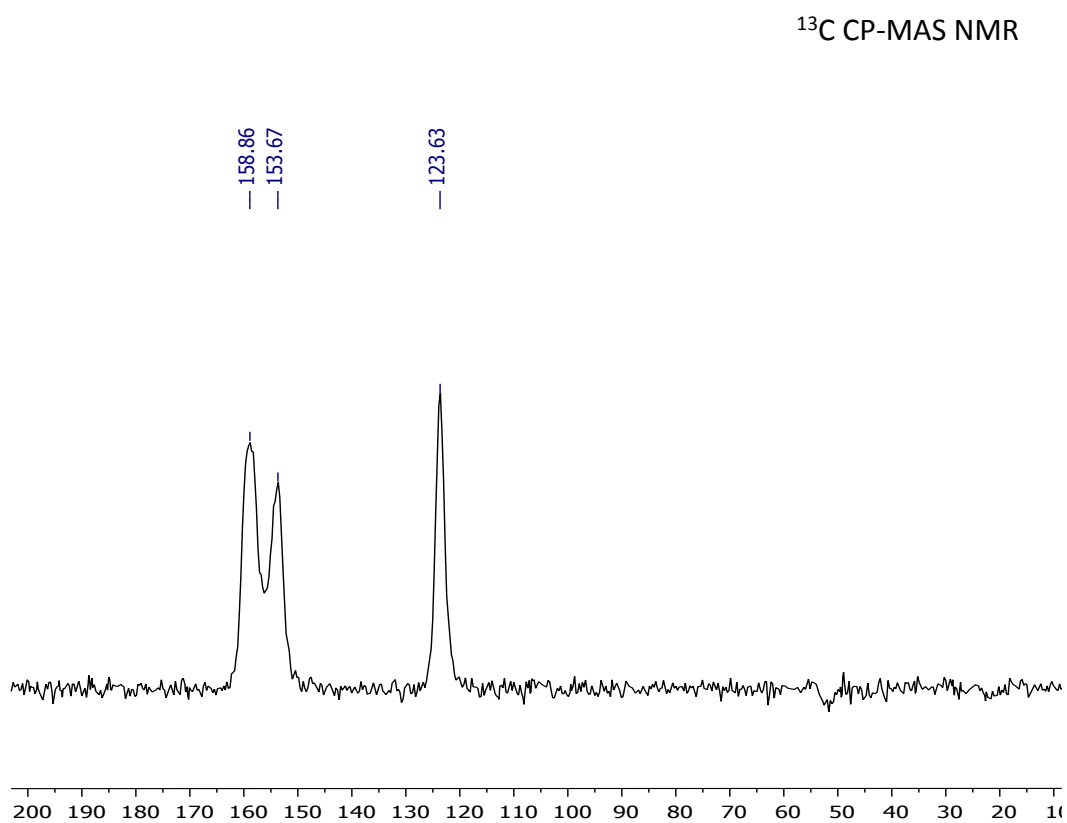

<sup>15</sup>N CP-MAS NMR

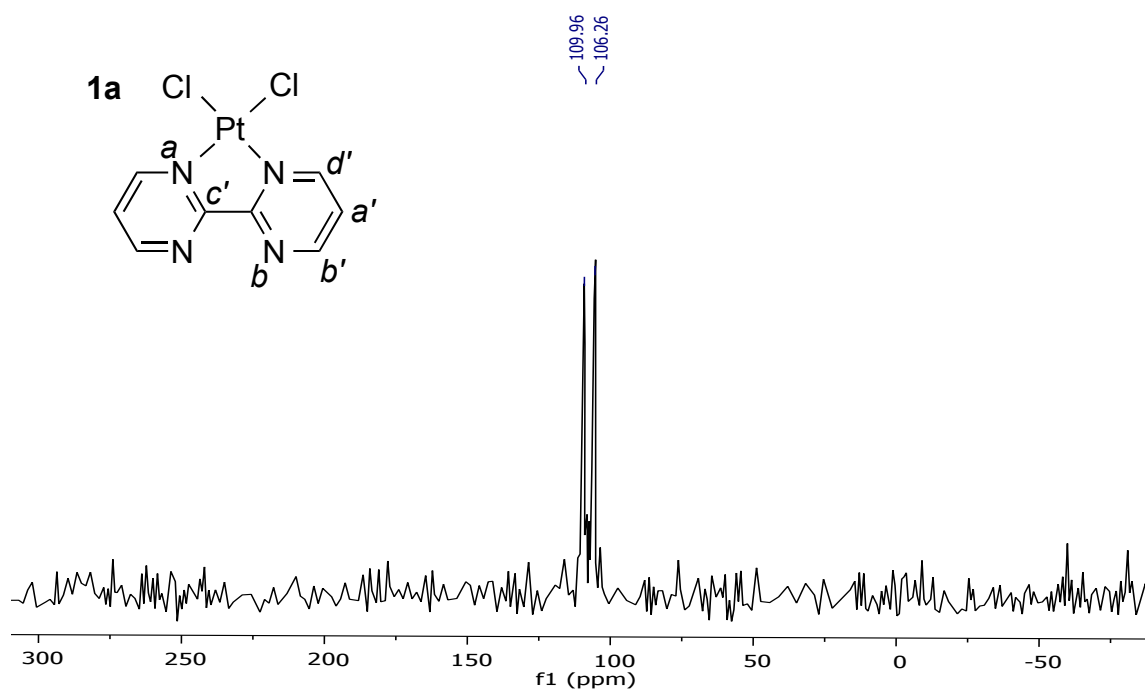

<sup>13</sup>C CP-MAS NMR

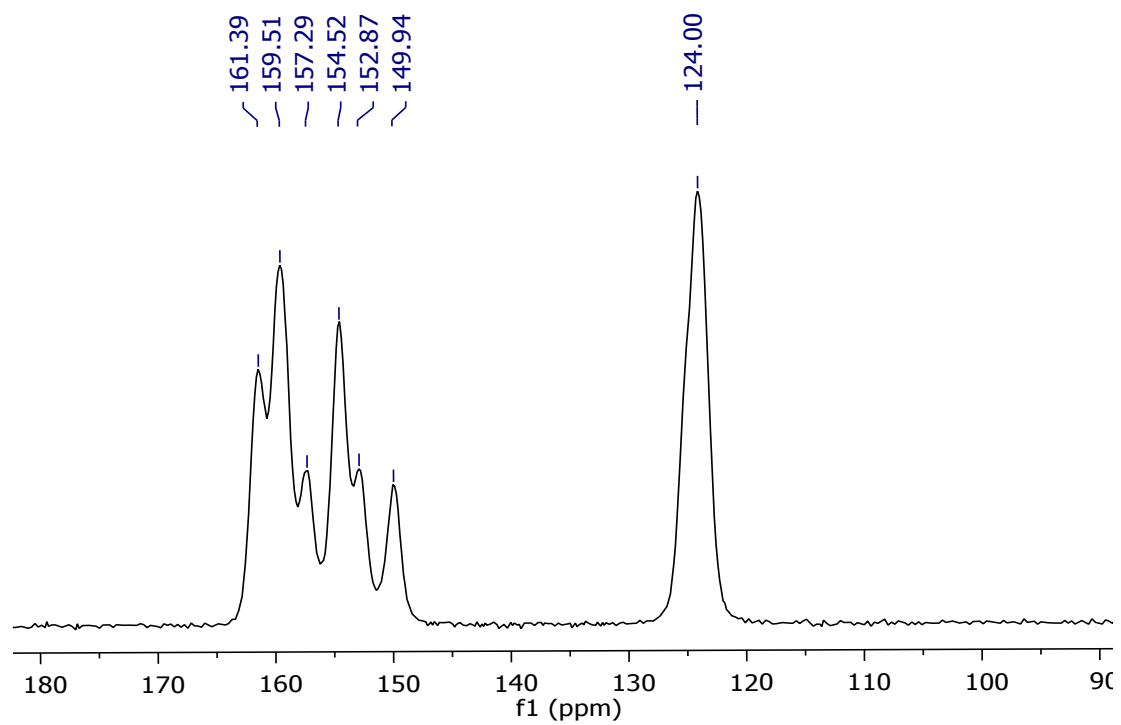

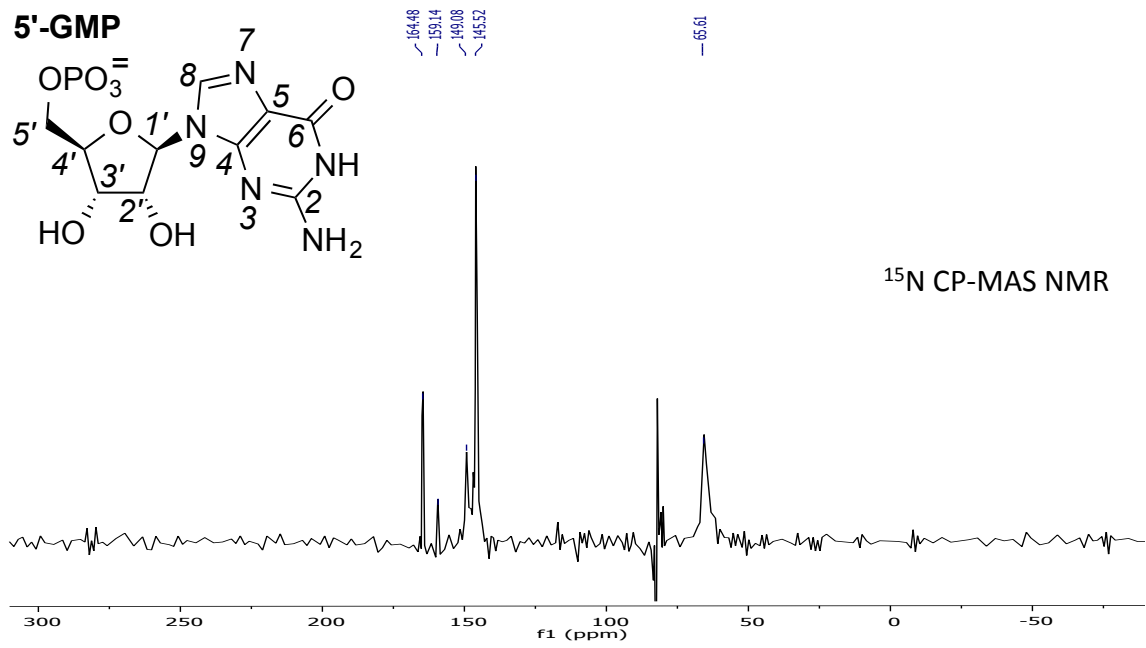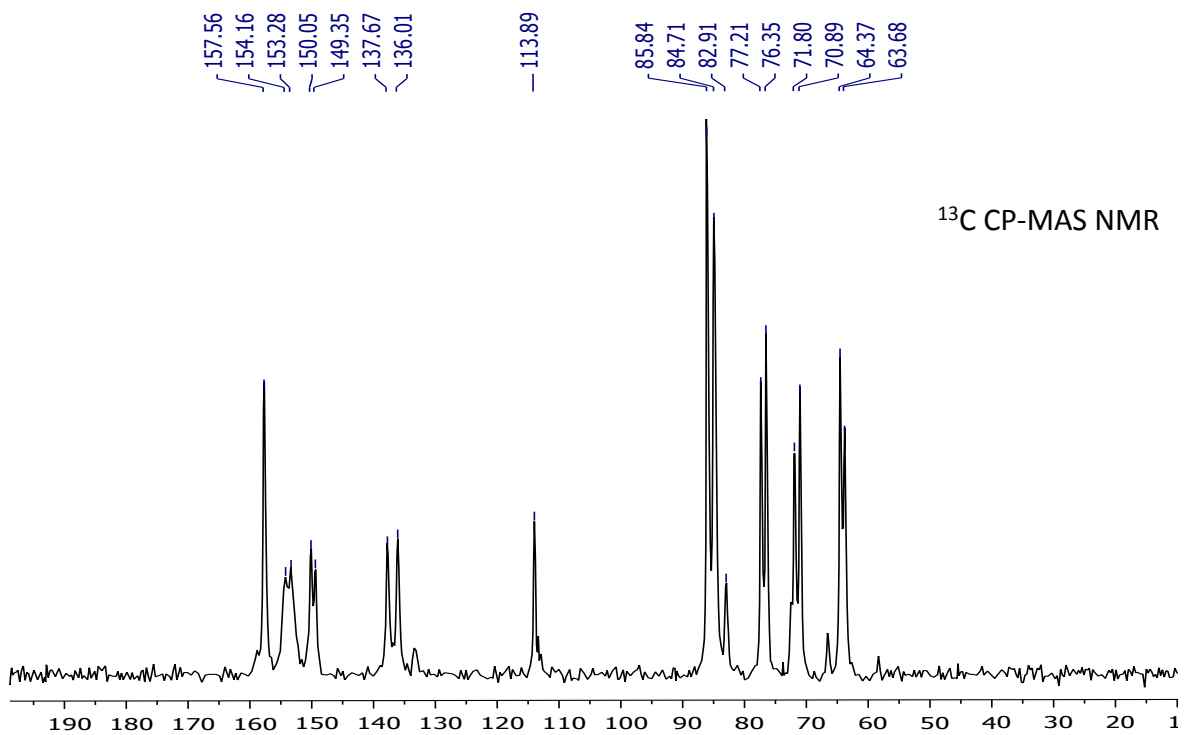

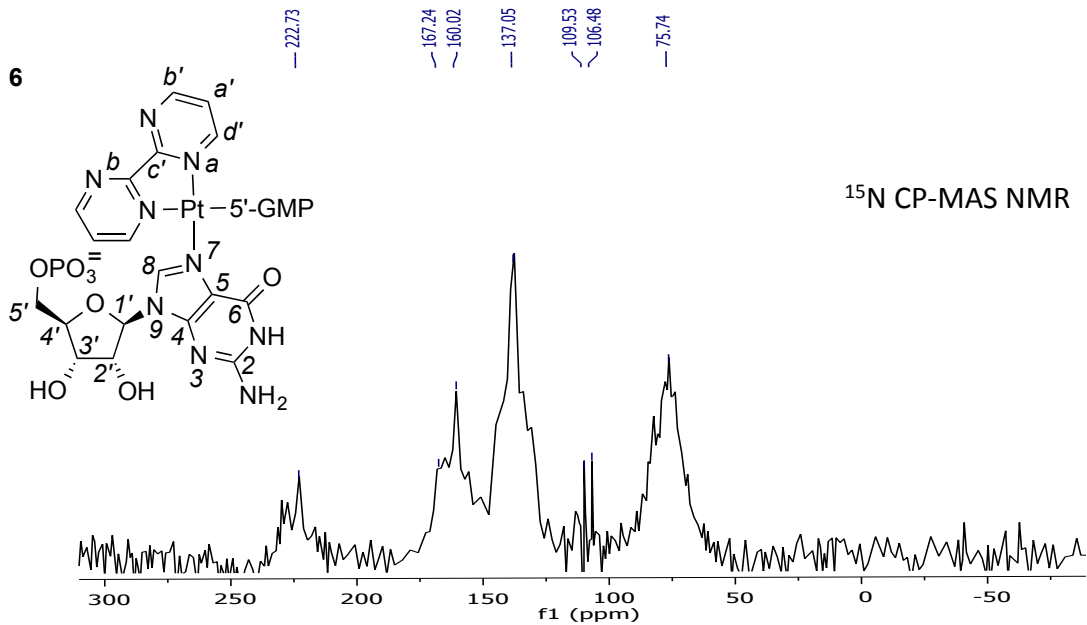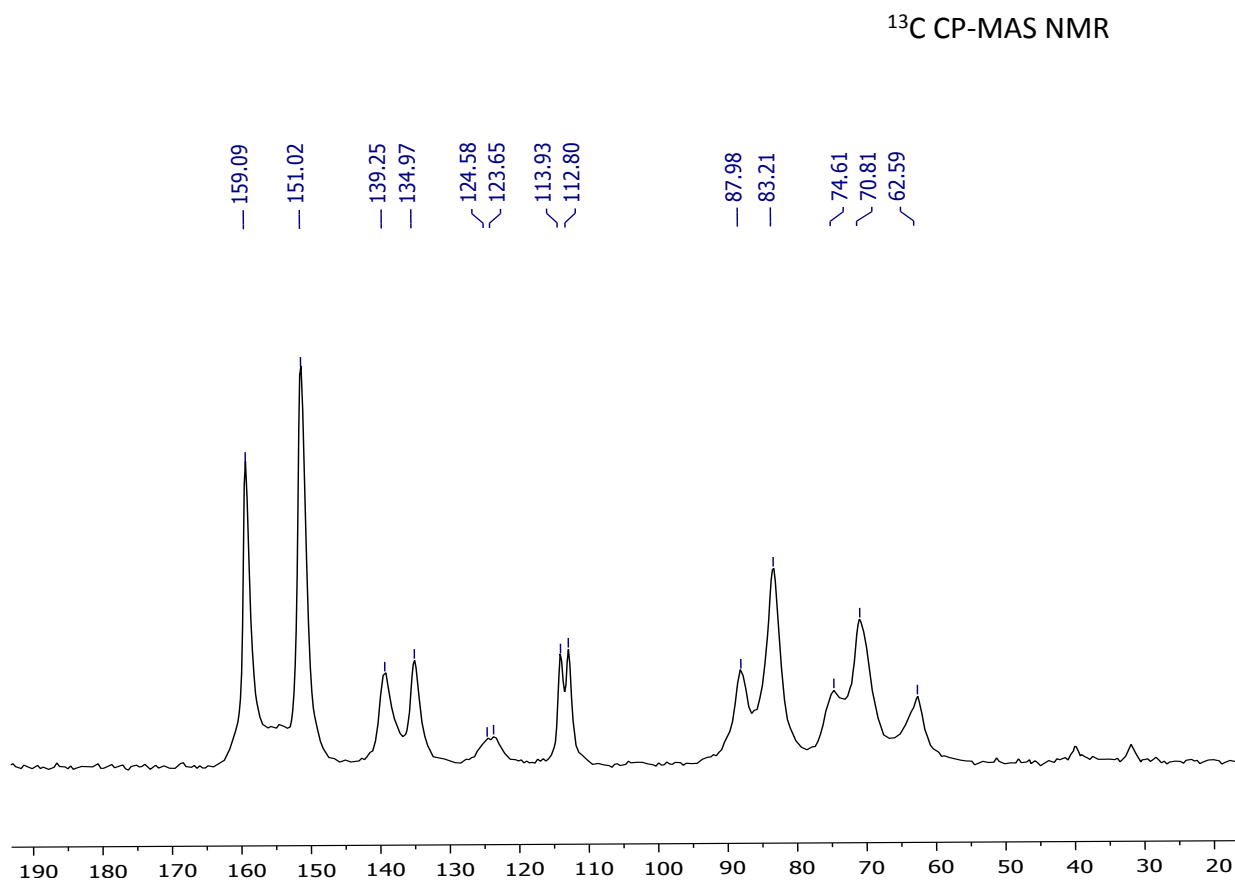

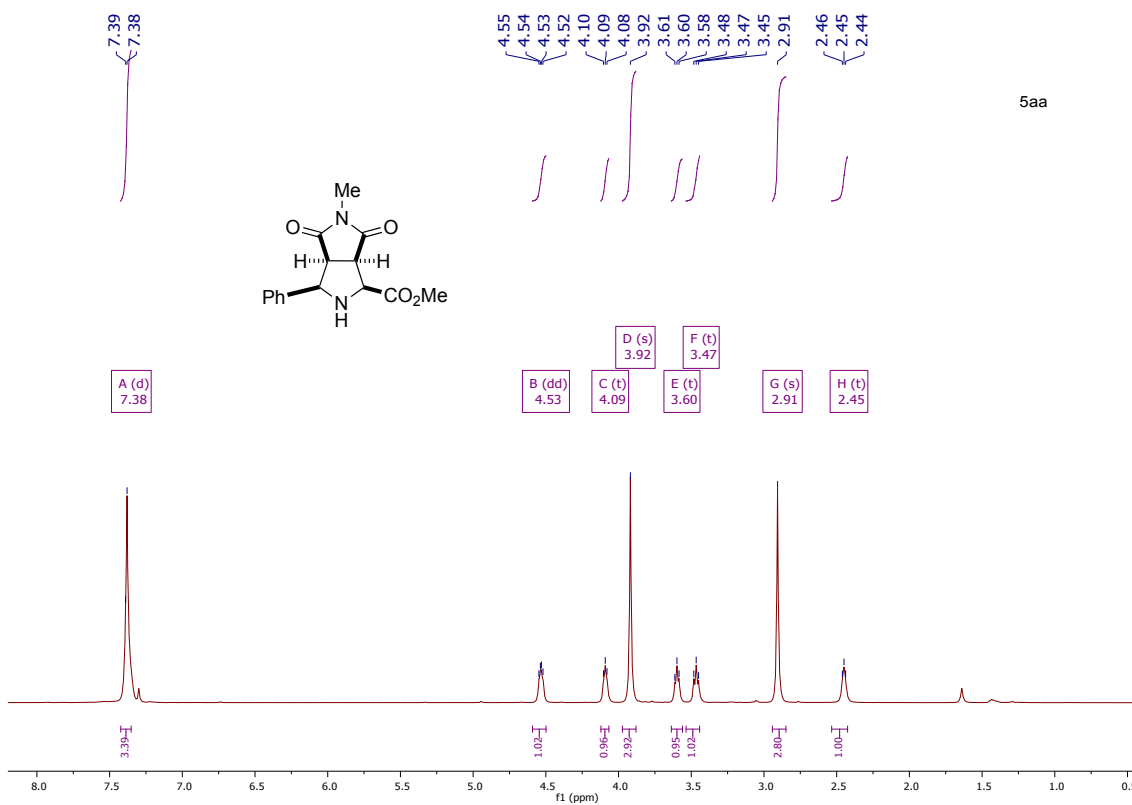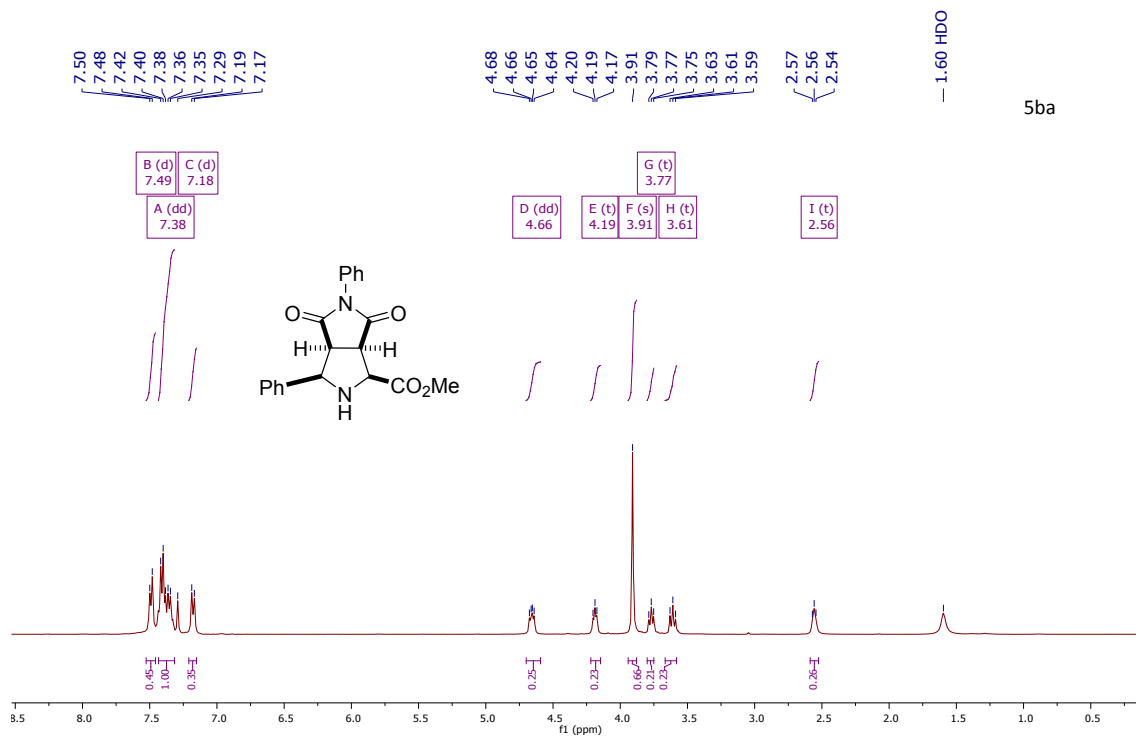

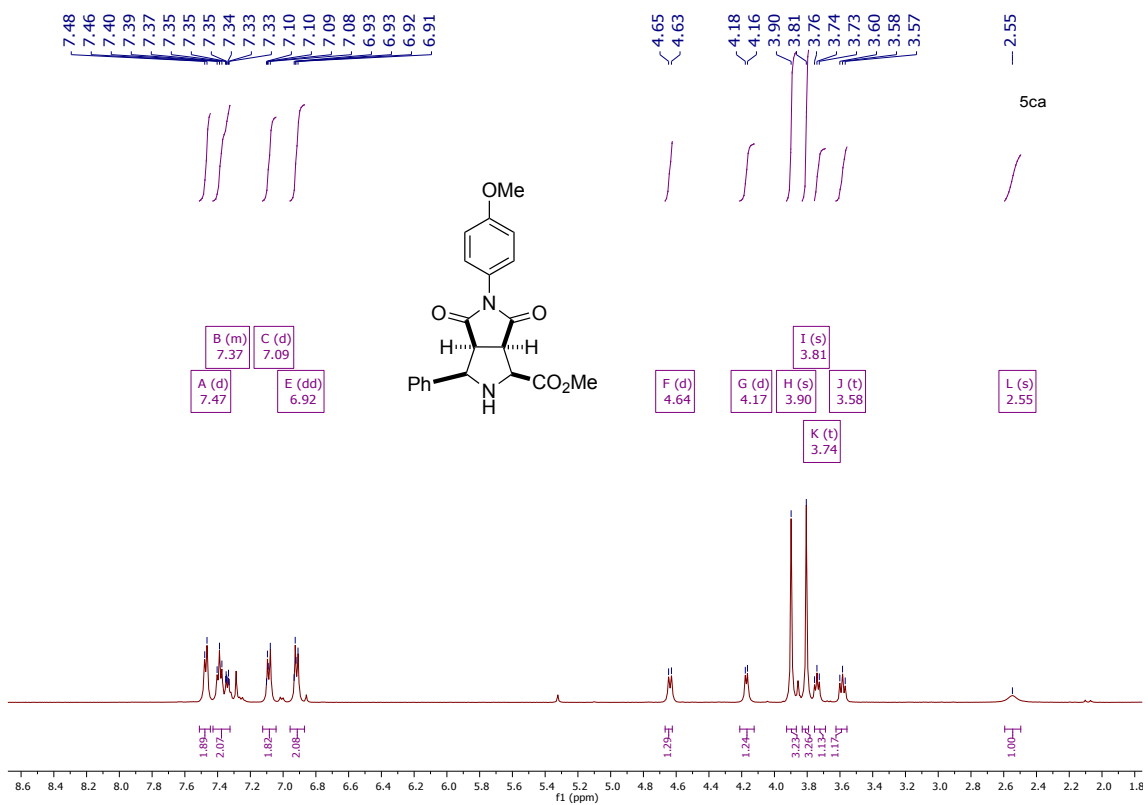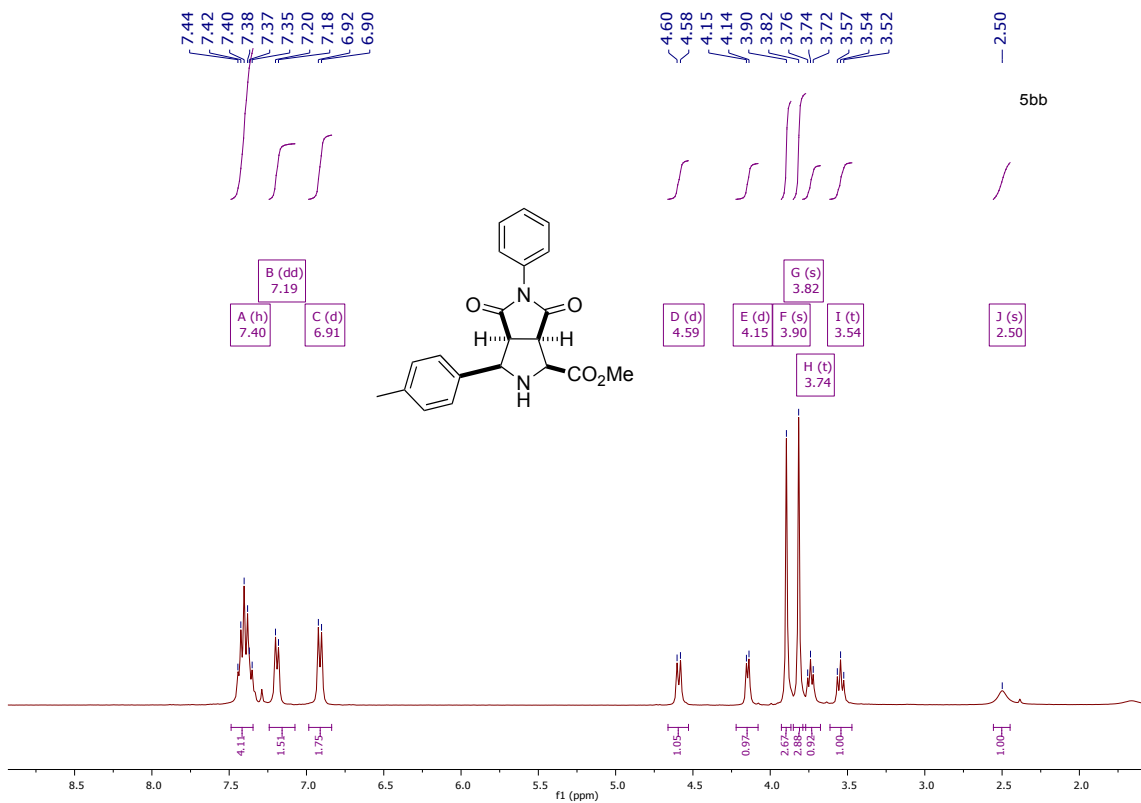



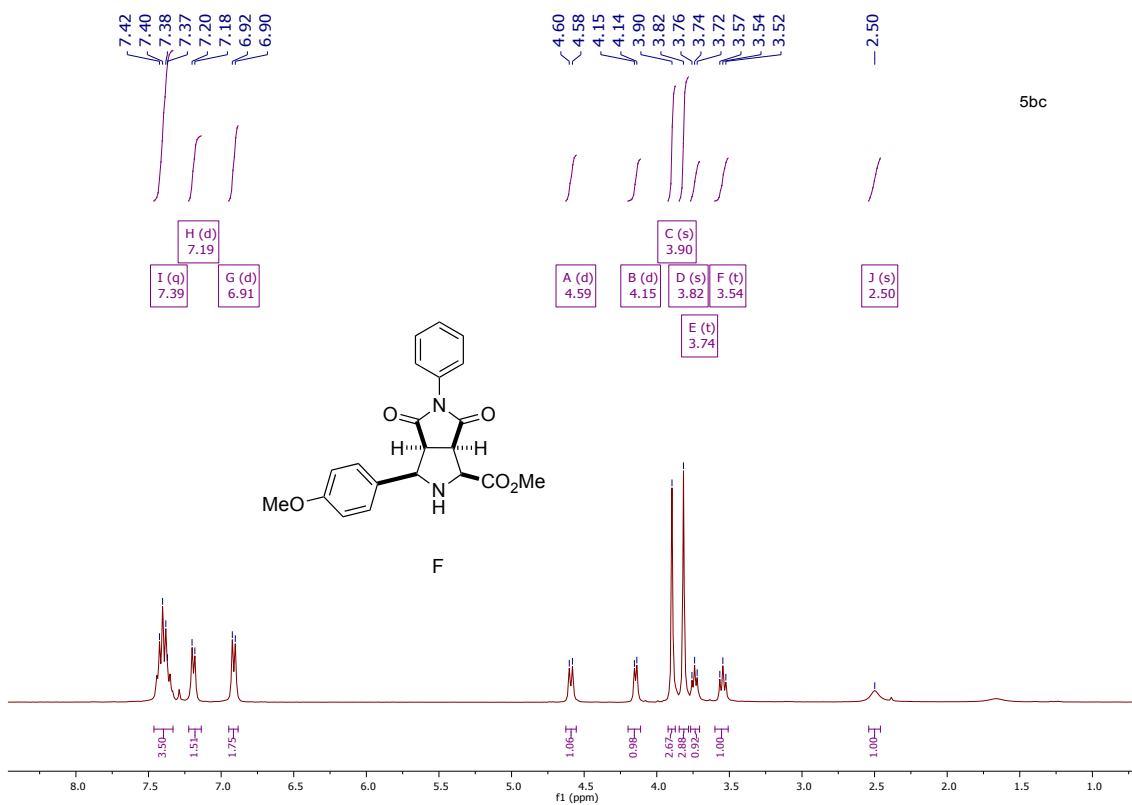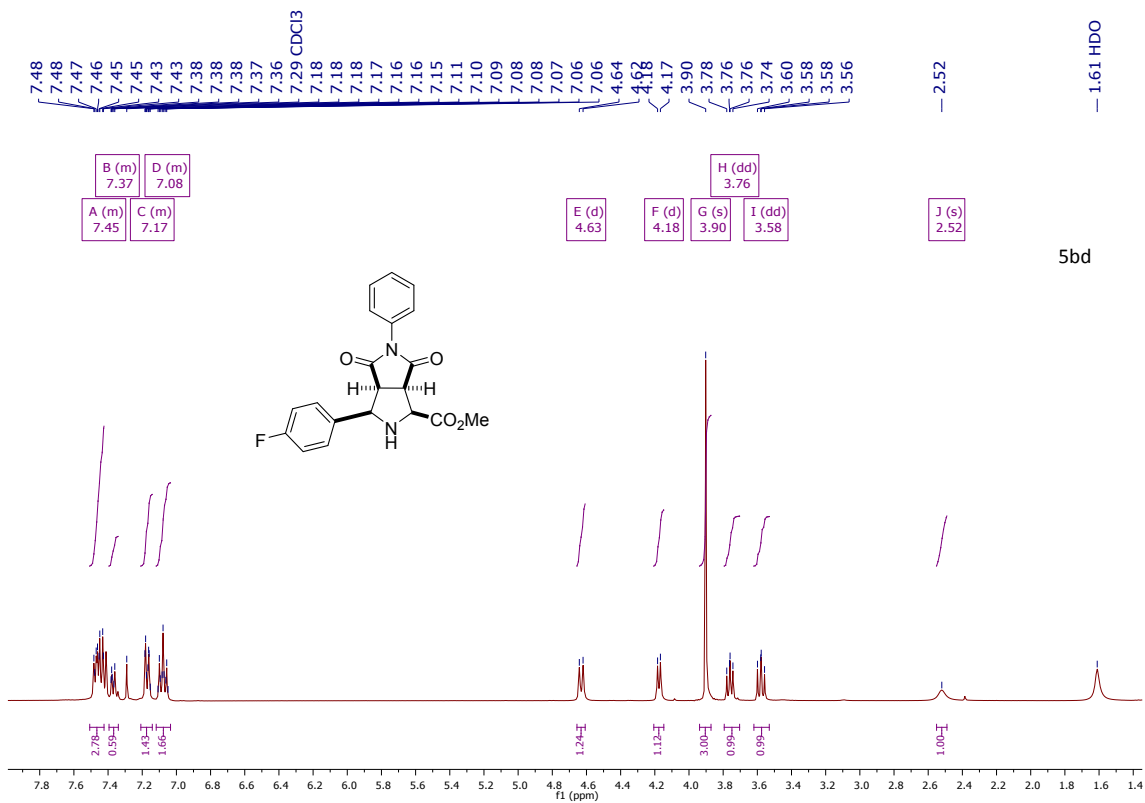

<sup>19</sup>F -NMR  
5bd

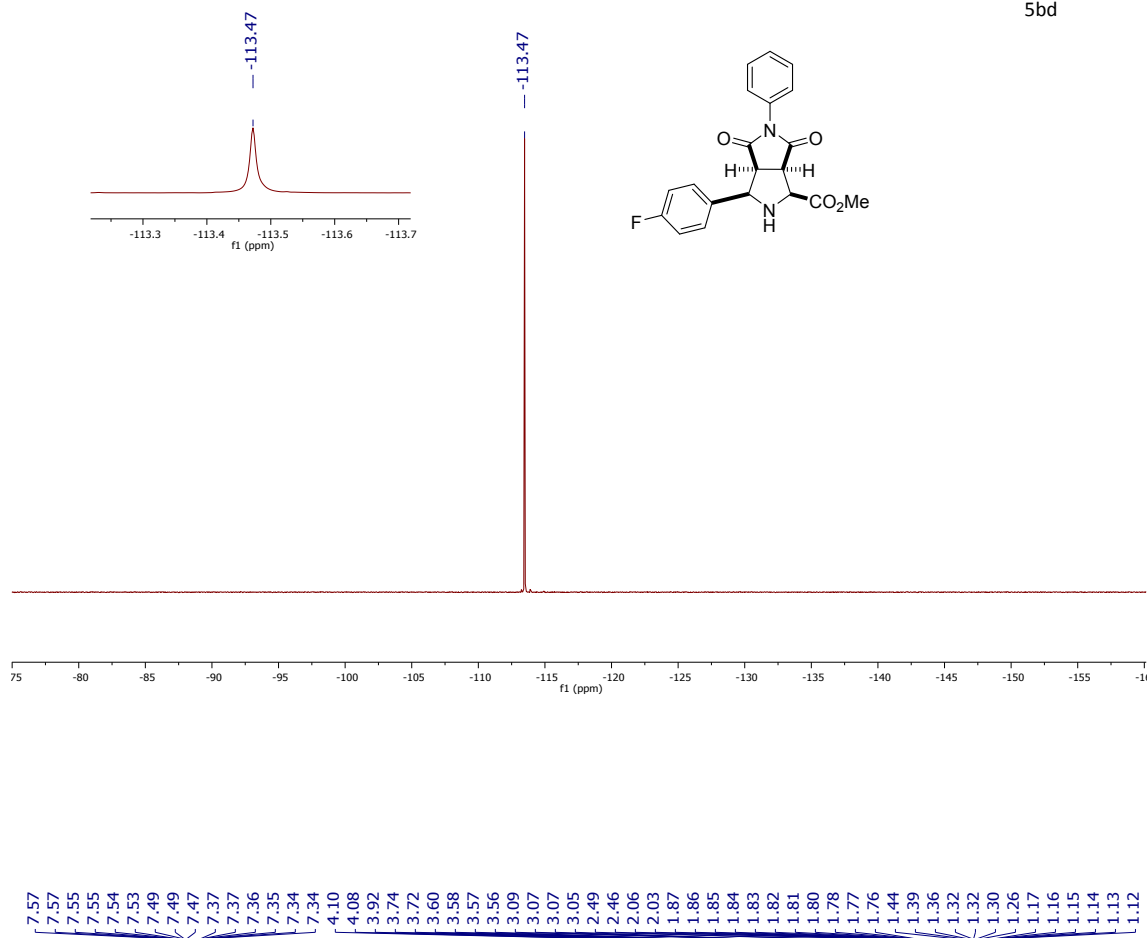

5be

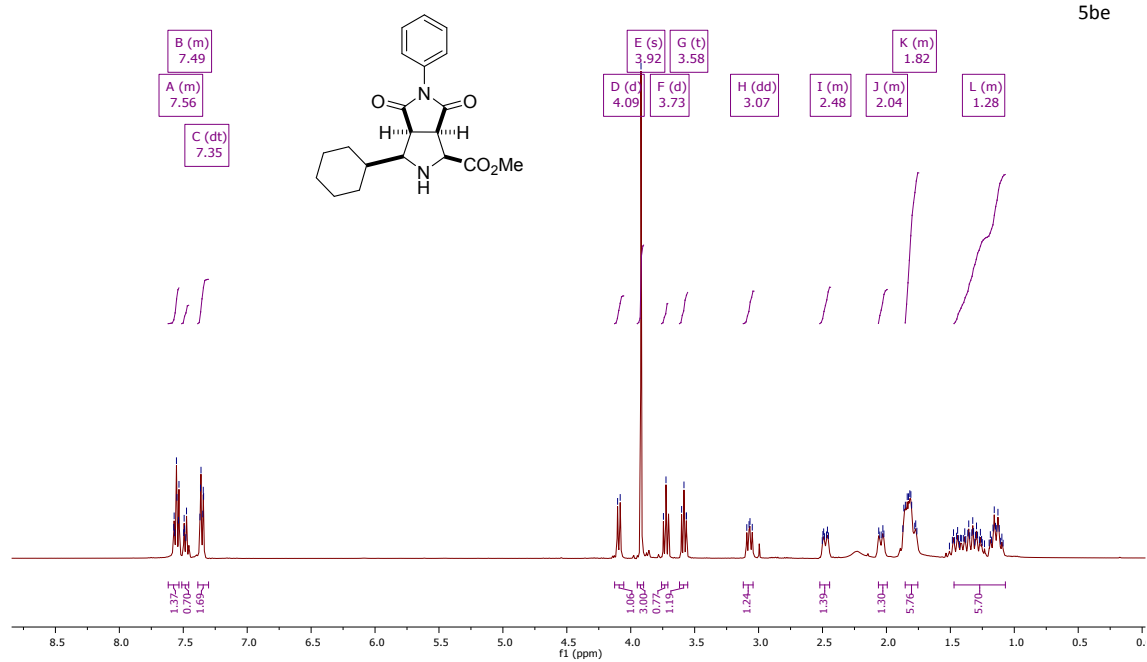

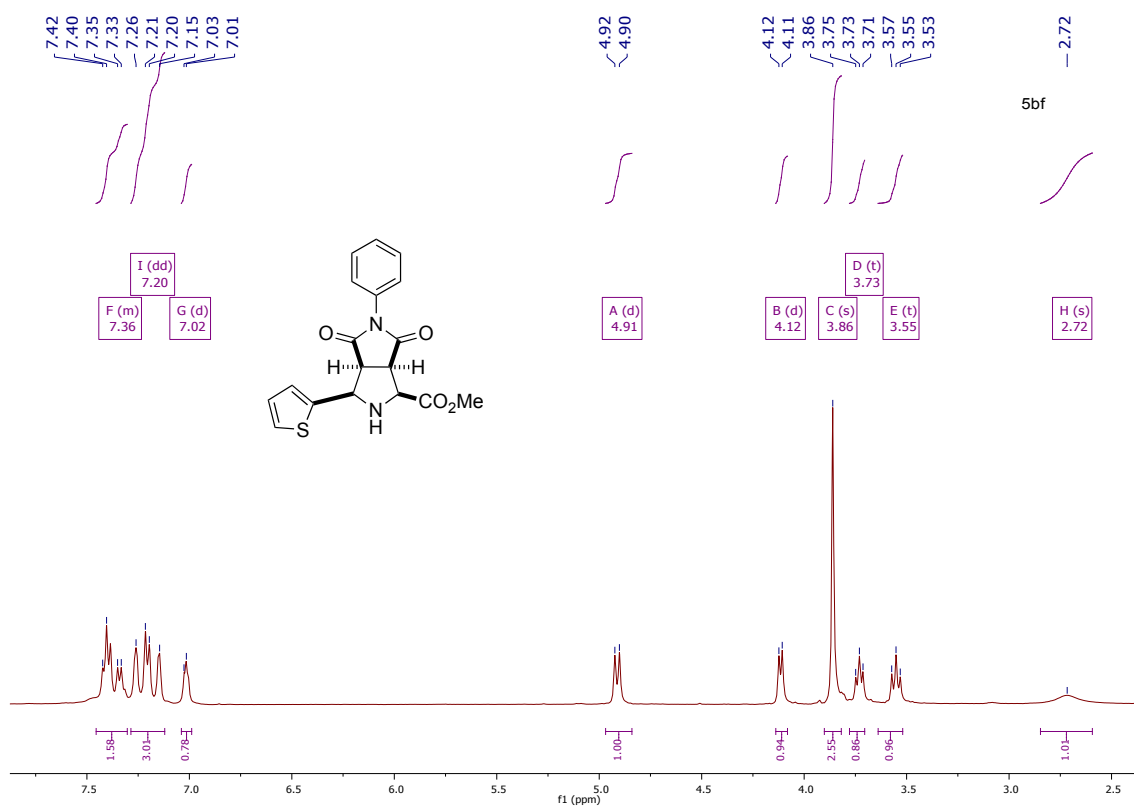

ORTEP diagram of cycloadducts 5bb and 5bf

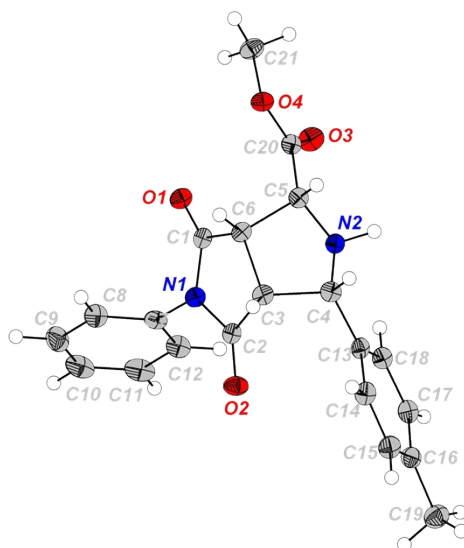

Figure S3. ORTEP drawing at 50% ellipsoid probability of the compound 5bb CCDC 1411373

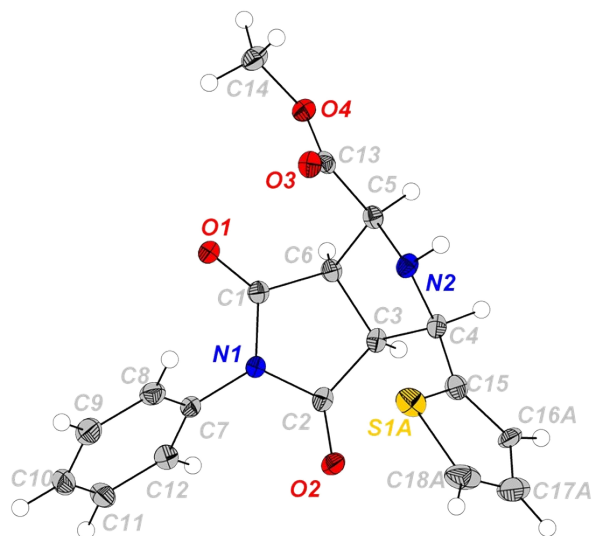

**Figure S4.** ORTEP drawing at 50% ellipsoid probability of the compound **5bf** CCDC 1411372

Cartesian coordinates of the QM partition of all the stationary points discussed in the main text.

INT2

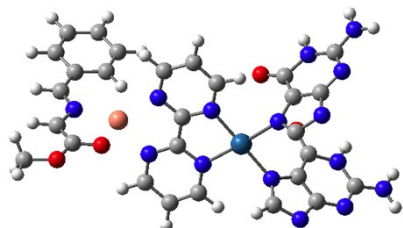

| Center Number | Atomic Number | Atomic Type | Coordinates (Angstroms) |           |           |
|---------------|---------------|-------------|-------------------------|-----------|-----------|
|               |               |             | X                       | Y         | Z         |
| 1             | 7             | 0           | -4.463108               | -3.595685 | 0.453014  |
| 2             | 6             | 0           | -3.199423               | -3.211987 | 0.026182  |
| 3             | 7             | 0           | -2.965528               | -1.938760 | 0.387863  |
| 4             | 6             | 0           | -4.129678               | -1.482982 | 1.046188  |
| 5             | 6             | 0           | -4.464390               | -0.218821 | 1.663195  |
| 6             | 7             | 0           | -5.806785               | -0.251401 | 2.186937  |
| 7             | 6             | 0           | -6.712267               | -1.293262 | 2.054697  |
| 8             | 7             | 0           | -7.983919               | -1.123748 | 2.504329  |
| 9             | 7             | 0           | -6.375489               | -2.457863 | 1.490717  |
| 10            | 6             | 0           | -5.096882               | -2.507613 | 1.041563  |
| 11            | 1             | 0           | -2.514698               | -3.846723 | -0.512879 |
| 12            | 1             | 0           | -6.063280               | 0.597368  | 2.683541  |
| 13            | 1             | 0           | -8.314956               | -0.273355 | 2.935491  |
| 14            | 1             | 0           | -8.611915               | -1.913352 | 2.431753  |
| 15            | 7             | 0           | -4.786106               | 0.444917  | -2.603052 |
| 16            | 6             | 0           | -3.736306               | -0.388511 | -2.262488 |
| 17            | 7             | 0           | -2.921746               | 0.220775  | -1.389703 |
| 18            | 6             | 0           | -3.433911               | 1.510366  | -1.185932 |
| 19            | 6             | 0           | -2.943053               | 2.616882  | -0.392680 |
| 20            | 8             | 0           | -1.887350               | 2.723778  | 0.255349  |
| 21            | 7             | 0           | -3.862995               | 3.722558  | -0.468758 |
| 22            | 6             | 0           | -5.008985               | 3.777912  | -1.246698 |
| 23            | 7             | 0           | -5.731232               | 4.932393  | -1.258003 |
| 24            | 7             | 0           | -5.423373               | 2.747860  | -1.994858 |
| 25            | 6             | 0           | -4.612342               | 1.658118  | -1.933169 |
| 26            | 1             | 0           | -3.591303               | 4.515193  | 0.107148  |
| 27            | 1             | 0           | -5.440573               | 5.770146  | -0.775937 |
| 28            | 1             | 0           | -6.562685               | 4.959252  | -1.831919 |
| 29            | 6             | 0           | 1.371099                | -1.004729 | 0.346412  |
| 30            | 6             | 0           | 0.166992                | -2.738025 | 1.406498  |
| 31            | 6             | 0           | 1.363710                | -3.223683 | 1.933152  |
| 32            | 1             | 0           | -0.783773               | -3.215397 | 1.607236  |
| 33            | 6             | 0           | 2.571892                | -2.522278 | 1.630769  |
| 34            | 1             | 0           | 1.382113                | -4.108991 | 2.553962  |
| 35            | 1             | 0           | 3.530189                | -2.860001 | 2.008776  |
| 36            | 6             | 0           | 1.338404                | 0.080244  | -0.541929 |
| 37            | 6             | 0           | 0.021127                | 1.449381  | -1.938134 |
| 38            | 6             | 0           | 1.169064                | 2.140802  | -2.327669 |
| 39            | 1             | 0           | -0.954302               | 1.693658  | -2.329838 |
| 40            | 6             | 0           | 2.418730                | 1.736936  | -1.774276 |
| 41            | 1             | 0           | 1.107563                | 2.959660  | -3.032608 |
| 42            | 1             | 0           | 3.343469                | 2.237126  | -2.041276 |
| 43            | 7             | 0           | 0.085216                | 0.422442  | -1.052746 |
| 44            | 7             | 0           | 2.506347                | 0.717049  | -0.906227 |
| 45            | 7             | 0           | 0.144505                | -1.634711 | 0.607963  |
| 46            | 7             | 0           | 2.572980                | -1.426768 | 0.865561  |
| 47            | 7             | 0           | 6.144681                | -0.071258 | 0.059449  |
| 48            | 6             | 0           | 6.803892                | -1.090957 | -0.617626 |
| 49            | 6             | 0           | 6.030995                | -2.008726 | -1.355388 |
| 50            | 8             | 0           | 4.739625                | -1.957607 | -1.436328 |
| 51            | 1             | 0           | 7.887468                | -1.128458 | -0.587496 |
| 52            | 6             | 0           | 6.834152                | 0.860835  | 0.696735  |

|    |    |   |           |           |           |
|----|----|---|-----------|-----------|-----------|
| 53 | 6  | 0 | 6.312533  | 2.016490  | 1.419566  |
| 54 | 6  | 0 | 4.934609  | 2.296347  | 1.624756  |
| 55 | 6  | 0 | 7.260405  | 2.939956  | 1.940830  |
| 56 | 6  | 0 | 4.531027  | 3.451299  | 2.312010  |
| 57 | 1  | 0 | 4.185772  | 1.604744  | 1.247057  |
| 58 | 6  | 0 | 6.854921  | 4.094101  | 2.623963  |
| 59 | 1  | 0 | 8.322064  | 2.746790  | 1.795876  |
| 60 | 6  | 0 | 5.484492  | 4.362041  | 2.814323  |
| 61 | 1  | 0 | 3.470098  | 3.645399  | 2.457791  |
| 62 | 1  | 0 | 7.609405  | 4.774790  | 3.007951  |
| 63 | 1  | 0 | 5.165695  | 5.255176  | 3.345180  |
| 64 | 1  | 0 | 7.927621  | 0.793580  | 0.668701  |
| 65 | 8  | 0 | 6.629926  | -3.054220 | -2.059203 |
| 66 | 6  | 0 | 8.075942  | -3.243631 | -1.986776 |
| 67 | 1  | 0 | 8.278993  | -4.133290 | -2.585162 |
| 68 | 1  | 0 | 8.612312  | -2.384955 | -2.410999 |
| 69 | 1  | 0 | 8.402827  | -3.409634 | -0.951918 |
| 70 | 8  | 0 | -3.790378 | 0.824588  | 1.780191  |
| 71 | 29 | 0 | 4.133086  | -0.364129 | -0.210464 |
| 72 | 78 | 0 | -1.422523 | -0.734678 | -0.337089 |

## INT2'

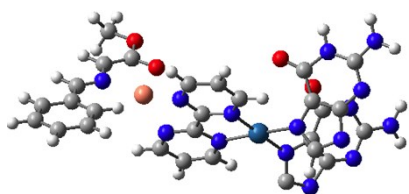

| Center Number | Atomic Number | Atomic Type | Coordinates (Angstroms) |           |           |
|---------------|---------------|-------------|-------------------------|-----------|-----------|
|               |               |             | X                       | Y         | Z         |
| 1             | 7             | 0           | -4.337901               | -2.971813 | -2.238062 |
| 2             | 6             | 0           | -3.118776               | -2.312777 | -2.306522 |
| 3             | 7             | 0           | -2.929767               | -1.581348 | -1.195734 |
| 4             | 6             | 0           | -4.090108               | -1.743374 | -0.402948 |
| 5             | 6             | 0           | -4.471376               | -1.209314 | 0.886825  |
| 6             | 7             | 0           | -5.792758               | -1.654233 | 1.251641  |
| 7             | 6             | 0           | -6.632119               | -2.443271 | 0.480101  |
| 8             | 7             | 0           | -7.876961               | -2.729526 | 0.944976  |
| 9             | 7             | 0           | -6.256921               | -2.928255 | -0.708036 |
| 10            | 6             | 0           | -5.001399               | -2.575911 | -1.080692 |
| 11            | 1             | 0           | -6.085413               | -1.330407 | 2.170856  |
| 12            | 1             | 0           | -8.253268               | -2.337088 | 1.793473  |
| 13            | 1             | 0           | -8.451592               | -3.352289 | 0.393498  |
| 14            | 7             | 0           | -4.819085               | 2.172375  | -1.593403 |
| 15            | 6             | 0           | -3.775275               | 1.322340  | -1.902836 |
| 16            | 7             | 0           | -2.937565               | 1.205189  | -0.863639 |
| 17            | 6             | 0           | -3.435340               | 2.037057  | 0.152665  |
| 18            | 6             | 0           | -2.957786               | 2.309512  | 1.492067  |
| 19            | 8             | 0           | -1.918618               | 1.930717  | 2.060114  |
| 20            | 7             | 0           | -3.869105               | 3.190744  | 2.175592  |
| 21            | 6             | 0           | -5.030597               | 3.732687  | 1.649714  |
| 22            | 7             | 0           | -5.780520               | 4.559710  | 2.431689  |
| 23            | 7             | 0           | -5.441498               | 3.474545  | 0.402548  |
| 24            | 6             | 0           | -4.625823               | 2.635927  | -0.290048 |
| 25            | 1             | 0           | -3.658806               | 0.820424  | -2.847215 |
| 26            | 1             | 0           | -3.587569               | 3.388789  | 3.131645  |
| 27            | 1             | 0           | -5.469761               | 4.909738  | 3.324440  |
| 28            | 1             | 0           | -6.630589               | 4.934248  | 2.034171  |
| 29            | 6             | 0           | 1.416943                | -0.826829 | -0.759776 |
| 30            | 6             | 0           | 0.224625                | -2.795387 | -1.292727 |
| 31            | 6             | 0           | 1.434015                | -3.478052 | -1.398269 |
| 32            | 1             | 0           | -0.723321               | -3.299004 | -1.439221 |
| 33            | 6             | 0           | 2.641843                | -2.760462 | -1.130106 |
| 34            | 1             | 0           | 1.463738                | -4.523103 | -1.669707 |

|    |    |   |           |           |           |
|----|----|---|-----------|-----------|-----------|
| 35 | 1  | 0 | 3.610183  | -3.246228 | -1.176252 |
| 36 | 6  | 0 | 1.355988  | 0.540551  | -0.443084 |
| 37 | 6  | 0 | -0.014149 | 2.443356  | -0.186168 |
| 38 | 6  | 0 | 1.104796  | 3.192254  | 0.173920  |
| 39 | 1  | 0 | -0.998183 | 2.879225  | -0.239208 |
| 40 | 6  | 0 | 2.360083  | 2.531275  | 0.244200  |
| 41 | 1  | 0 | 1.011811  | 4.240058  | 0.419963  |
| 42 | 1  | 0 | 3.254048  | 3.054884  | 0.561291  |
| 43 | 7  | 0 | 0.088217  | 1.124941  | -0.487601 |
| 44 | 7  | 0 | 2.489212  | 1.230799  | -0.061600 |
| 45 | 7  | 0 | 0.185517  | -1.467689 | -0.983038 |
| 46 | 7  | 0 | 2.628795  | -1.466403 | -0.815427 |
| 47 | 7  | 0 | 5.799880  | -0.580766 | 1.069495  |
| 48 | 6  | 0 | 5.620427  | -1.433334 | 2.154547  |
| 49 | 6  | 0 | 4.308189  | -1.642347 | 2.635569  |
| 50 | 8  | 0 | 3.255113  | -1.099954 | 2.121081  |
| 51 | 1  | 0 | 6.493792  | -1.883657 | 2.616278  |
| 52 | 6  | 0 | 7.011386  | -0.303889 | 0.613651  |
| 53 | 6  | 0 | 7.368270  | 0.630794  | -0.452326 |
| 54 | 6  | 0 | 6.454344  | 1.489598  | -1.120331 |
| 55 | 6  | 0 | 8.738023  | 0.708234  | -0.828378 |
| 56 | 6  | 0 | 6.893778  | 2.371394  | -2.118635 |
| 57 | 1  | 0 | 5.400072  | 1.459670  | -0.851660 |
| 58 | 6  | 0 | 9.175900  | 1.591026  | -1.826345 |
| 59 | 1  | 0 | 9.458923  | 0.067379  | -0.325292 |
| 60 | 6  | 0 | 8.255348  | 2.432057  | -2.481370 |
| 61 | 1  | 0 | 6.177958  | 3.020376  | -2.616801 |
| 62 | 1  | 0 | 10.229512 | 1.624386  | -2.091945 |
| 63 | 1  | 0 | 8.589394  | 3.118680  | -3.254781 |
| 64 | 1  | 0 | 7.860882  | -0.799415 | 1.095453  |
| 65 | 8  | 0 | 4.066368  | -2.468205 | 3.737906  |
| 66 | 6  | 0 | 5.162871  | -3.212512 | 4.348261  |
| 67 | 1  | 0 | 4.721446  | -3.712049 | 5.211934  |
| 68 | 1  | 0 | 5.566181  | -3.955521 | 3.648350  |
| 69 | 1  | 0 | 5.969621  | -2.549527 | 4.686577  |
| 70 | 8  | 0 | -3.852661 | -0.450411 | 1.657997  |
| 71 | 29 | 0 | 3.973853  | -0.035295 | 0.408368  |
| 72 | 78 | 0 | -1.408765 | -0.195317 | -0.861626 |

-----

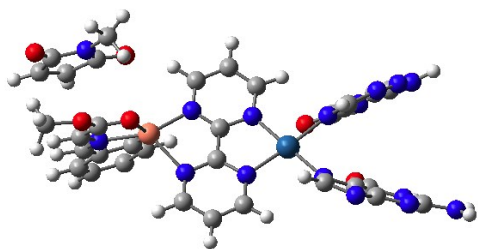

| Center Number | Atomic Number | Atomic Type | Coordinates (Angstroms) |           |           |
|---------------|---------------|-------------|-------------------------|-----------|-----------|
|               |               |             | X                       | Y         | Z         |
| 1             | 7             | 0           | -5.235566               | -3.636416 | -0.014596 |
| 2             | 6             | 0           | -3.927964               | -3.183214 | -0.137262 |
| 3             | 7             | 0           | -3.836665               | -1.917273 | 0.299828  |
| 4             | 6             | 0           | -5.136691               | -1.530379 | 0.697654  |
| 5             | 6             | 0           | -5.654254               | -0.312121 | 1.280728  |
| 6             | 7             | 0           | -7.083892               | -0.396910 | 1.438566  |
| 7             | 6             | 0           | -7.892508               | -1.449041 | 1.037460  |
| 8             | 7             | 0           | -9.242845               | -1.308613 | 1.124631  |
| 9             | 7             | 0           | -7.385406               | -2.586228 | 0.549418  |
| 10            | 6             | 0           | -6.033432               | -2.584752 | 0.431909  |
| 11            | 1             | 0           | -3.112403               | -3.764587 | -0.535113 |
| 12            | 1             | 0           | -7.488183               | 0.422119  | 1.883163  |
| 13            | 1             | 0           | -9.694003               | -0.472471 | 1.466654  |
| 14            | 1             | 0           | -9.813095               | -2.098207 | 0.853255  |
| 15            | 7             | 0           | -5.388247               | 0.634204  | -2.613826 |
| 16            | 6             | 0           | -4.350901               | -0.196262 | -2.234631 |
| 17            | 7             | 0           | -3.605122               | 0.387262  | -1.287236 |
| 18            | 6             | 0           | -4.149999               | 1.660543  | -1.068959 |
| 19            | 6             | 0           | -3.747875               | 2.734137  | -0.187974 |
| 20            | 8             | 0           | -2.734303               | 2.836836  | 0.526821  |
| 21            | 7             | 0           | -4.700459               | 3.811329  | -0.254670 |
| 22            | 6             | 0           | -5.825534               | 3.856967  | -1.063277 |
| 23            | 7             | 0           | -6.635704               | 4.950622  | -0.999707 |
| 24            | 7             | 0           | -6.145757               | 2.869008  | -1.908412 |
| 25            | 6             | 0           | -5.286736               | 1.815579  | -1.876119 |
| 26            | 1             | 0           | -4.160604               | -1.168716 | -2.653865 |
| 27            | 1             | 0           | -4.473784               | 4.585280  | 0.363391  |
| 28            | 1             | 0           | -6.414162               | 5.773621  | -0.459176 |
| 29            | 1             | 0           | -7.434718               | 4.970486  | -1.618790 |
| 30            | 6             | 0           | 0.497821                | -1.149647 | 0.642262  |
| 31            | 6             | 0           | -0.866182               | -2.825710 | 1.602696  |
| 32            | 6             | 0           | 0.273621                | -3.421303 | 2.140425  |
| 33            | 1             | 0           | -1.856214               | -3.230427 | 1.775192  |
| 34            | 6             | 0           | 1.539846                | -2.797203 | 1.904628  |
| 35            | 1             | 0           | 0.208501                | -4.328076 | 2.725266  |
| 36            | 6             | 0           | 0.572819                | -0.017781 | -0.185276 |
| 37            | 6             | 0           | -0.595457               | 1.559977  | -1.495423 |
| 38            | 6             | 0           | 0.617126                | 2.167302  | -1.821109 |
| 39            | 1             | 0           | -1.538339               | 1.932383  | -1.867638 |
| 40            | 6             | 0           | 1.818579                | 1.619213  | -1.291070 |
| 41            | 1             | 0           | 0.649403                | 3.034559  | -2.467507 |
| 42            | 1             | 0           | 2.796658                | 2.027898  | -1.521812 |
| 43            | 7             | 0           | -0.633654               | 0.462213  | -0.693879 |
| 44            | 7             | 0           | 1.794589                | 0.545318  | -0.481152 |
| 45            | 7             | 0           | -0.780585               | -1.699508 | 0.838166  |
| 46            | 7             | 0           | 1.645667                | -1.680561 | 1.181944  |
| 47            | 7             | 0           | 5.257814                | -0.476486 | 0.982630  |
| 48            | 6             | 0           | 5.988208                | -1.500150 | 0.396587  |
| 49            | 6             | 0           | 5.346208                | -2.282049 | -0.595378 |
| 50            | 8             | 0           | 4.127169                | -2.076622 | -0.973744 |
| 51            | 6             | 0           | 5.814625                | 0.316849  | 1.886588  |
| 52            | 6             | 0           | 5.202830                | 1.457196  | 2.565132  |
| 53            | 6             | 0           | 3.947757                | 2.025157  | 2.219522  |
| 54            | 6             | 0           | 5.937077                | 2.060657  | 3.622346  |
| 55            | 6             | 0           | 3.455800                | 3.145022  | 2.905123  |
| 56            | 1             | 0           | 3.374558                | 1.598943  | 1.402014  |
| 57            | 6             | 0           | 5.438181                | 3.174734  | 4.311906  |
| 58            | 1             | 0           | 6.901757                | 1.641991  | 3.903301  |
| 59            | 6             | 0           | 4.191482                | 3.727234  | 3.957479  |



|    |    |   |           |           |           |
|----|----|---|-----------|-----------|-----------|
| 60 | 1  | 0 | 2.500918  | 3.576345  | 2.614981  |
| 61 | 1  | 0 | 6.023357  | 3.608593  | 5.117365  |
| 62 | 8  | 0 | 5.995873  | -3.328765 | -1.232538 |
| 63 | 6  | 0 | 7.420995  | -3.575902 | -0.987146 |
| 64 | 1  | 0 | 7.663253  | -4.448529 | -1.595998 |
| 65 | 1  | 0 | 8.022321  | -2.721653 | -1.313615 |
| 66 | 1  | 0 | 7.607148  | -3.800273 | 0.071048  |
| 67 | 8  | 0 | -5.066739 | 0.732759  | 1.628895  |
| 68 | 1  | 0 | 7.008949  | -1.682988 | 0.715610  |
| 69 | 1  | 0 | 6.847933  | 0.105982  | 2.186005  |
| 70 | 6  | 0 | 8.019827  | 1.097084  | -0.843087 |
| 71 | 6  | 0 | 6.984902  | 1.920052  | -0.553394 |
| 72 | 1  | 0 | 8.983036  | 1.014834  | -0.361935 |
| 73 | 1  | 0 | 6.884619  | 2.658435  | 0.229331  |
| 74 | 7  | 0 | 6.326849  | 0.640400  | -2.383911 |
| 75 | 6  | 0 | 5.544714  | 0.020571  | -3.457425 |
| 76 | 1  | 0 | 5.071590  | 0.797114  | -4.066271 |
| 77 | 1  | 0 | 6.230957  | -0.562439 | -4.076610 |
| 78 | 1  | 0 | 4.782270  | -0.647109 | -3.042103 |
| 79 | 6  | 0 | 7.634008  | 0.235916  | -2.008328 |
| 80 | 8  | 0 | 8.302902  | -0.647446 | -2.576978 |
| 81 | 6  | 0 | 5.878718  | 1.656276  | -1.535934 |
| 82 | 8  | 0 | 4.768017  | 2.227175  | -1.609783 |
| 83 | 78 | 0 | -2.229677 | -0.668116 | -0.159313 |
| 84 | 29 | 0 | 3.328743  | -0.578035 | 0.269016  |
| 85 | 1  | 0 | 2.455625  | -3.214934 | 2.308430  |
| 86 | 1  | 0 | 3.807789  | 4.578170  | 4.480535  |

### exo-RC

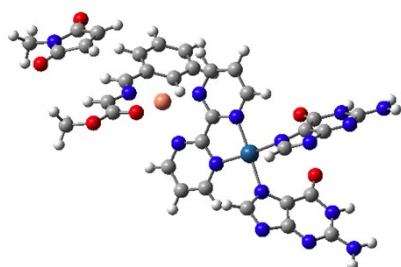

| Center Number | Atomic Number | Atomic Type | Coordinates (Angstroms) |           |           |
|---------------|---------------|-------------|-------------------------|-----------|-----------|
|               |               |             | X                       | Y         | Z         |
| 1             | 7             | 0           | -5.240437               | -3.737132 | 0.356522  |
| 2             | 6             | 0           | -3.998551               | -3.170209 | 0.099330  |
| 3             | 7             | 0           | -4.014093               | -1.862270 | 0.401461  |
| 4             | 6             | 0           | -5.325693               | -1.564248 | 0.842011  |
| 5             | 6             | 0           | -5.944415               | -0.346793 | 1.318504  |
| 6             | 7             | 0           | -7.337423               | -0.563624 | 1.610463  |
| 7             | 6             | 0           | -8.039636               | -1.744729 | 1.424265  |
| 8             | 7             | 0           | -9.376159               | -1.757570 | 1.673935  |
| 9             | 7             | 0           | -7.442340               | -2.863985 | 1.003833  |
| 10            | 6             | 0           | -6.115340               | -2.728289 | 0.757261  |
| 11            | 1             | 0           | -3.149848               | -3.710024 | -0.287613 |
| 12            | 1             | 0           | -7.802777               | 0.256917  | 1.990806  |
| 13            | 1             | 0           | -9.899169               | -0.931710 | 1.925957  |
| 14            | 1             | 0           | -9.860928               | -2.640950 | 1.589686  |
| 15            | 7             | 0           | -5.749560               | 0.399394  | -2.694270 |
| 16            | 6             | 0           | -4.652299               | -0.323405 | -2.263619 |
| 17            | 7             | 0           | -3.968536               | 0.360996  | -1.338349 |
| 18            | 6             | 0           | -4.620462               | 1.592249  | -1.182942 |
| 19            | 6             | 0           | -4.321662               | 2.722309  | -0.330652 |
| 20            | 8             | 0           | -3.321862               | 2.934755  | 0.380035  |
| 21            | 7             | 0           | -5.368925               | 3.701967  | -0.421243 |
| 22            | 6             | 0           | -6.488611               | 3.619824  | -1.236498 |

|    |    |   |           |           |           |
|----|----|---|-----------|-----------|-----------|
| 23 | 7  | 0 | -7.390137 | 4.641118  | -1.190131 |
| 24 | 7  | 0 | -6.710461 | 2.589169  | -2.062813 |
| 25 | 6  | 0 | -5.761687 | 1.615101  | -2.000512 |
| 26 | 1  | 0 | -4.382731 | -1.298662 | -2.630776 |
| 27 | 1  | 0 | -5.229336 | 4.506236  | 0.186817  |
| 28 | 1  | 0 | -7.235527 | 5.481598  | -0.652884 |
| 29 | 1  | 0 | -8.190826 | 4.592353  | -1.805078 |
| 30 | 6  | 0 | 0.260515  | -0.790769 | 0.600325  |
| 31 | 6  | 0 | -0.956285 | -2.538390 | 1.621792  |
| 32 | 6  | 0 | 0.232606  | -3.032440 | 2.155466  |
| 33 | 1  | 0 | -1.908756 | -3.010218 | 1.827760  |
| 34 | 6  | 0 | 1.439976  | -2.312543 | 1.896442  |
| 35 | 1  | 0 | 0.247888  | -3.928701 | 2.758469  |
| 36 | 1  | 0 | 2.389799  | -2.638071 | 2.305932  |
| 37 | 6  | 0 | 0.243785  | 0.311136  | -0.270267 |
| 38 | 6  | 0 | -1.060165 | 1.746251  | -1.616848 |
| 39 | 6  | 0 | 0.093479  | 2.455298  | -1.958848 |
| 40 | 1  | 0 | -2.033973 | 2.010911  | -2.000195 |
| 41 | 6  | 0 | 1.335734  | 2.019028  | -1.424398 |
| 42 | 1  | 0 | 0.049558  | 3.314223  | -2.613764 |
| 43 | 1  | 0 | 2.261279  | 2.528655  | -1.664352 |
| 44 | 7  | 0 | -1.001458 | 0.675526  | -0.784532 |
| 45 | 7  | 0 | 1.417486  | 0.958469  | -0.604884 |
| 46 | 7  | 0 | -0.969567 | -1.429265 | 0.827721  |
| 47 | 7  | 0 | 1.445944  | -1.209477 | 1.149711  |
| 48 | 7  | 0 | 4.973318  | -0.273514 | 0.511549  |
| 49 | 6  | 0 | 5.446703  | -1.481641 | 0.019304  |
| 50 | 6  | 0 | 4.579153  | -2.234134 | -0.817737 |
| 51 | 8  | 0 | 3.411293  | -1.815681 | -1.173755 |
| 52 | 6  | 0 | 5.744917  | 0.547952  | 1.207695  |
| 53 | 6  | 0 | 5.339991  | 1.830687  | 1.792003  |
| 54 | 6  | 0 | 3.990810  | 2.249725  | 1.939281  |
| 55 | 6  | 0 | 6.362154  | 2.702545  | 2.256162  |
| 56 | 6  | 0 | 3.680703  | 3.487489  | 2.522523  |
| 57 | 1  | 0 | 3.185909  | 1.591493  | 1.622047  |
| 58 | 6  | 0 | 6.047600  | 3.938744  | 2.840199  |
| 59 | 1  | 0 | 7.404461  | 2.415910  | 2.136923  |
| 60 | 6  | 0 | 4.705564  | 4.341383  | 2.977579  |
| 61 | 1  | 0 | 2.640776  | 3.783924  | 2.638488  |
| 62 | 1  | 0 | 6.846723  | 4.587921  | 3.185939  |
| 63 | 1  | 0 | 4.463206  | 5.294220  | 3.438691  |
| 64 | 8  | 0 | 4.931968  | -3.482829 | -1.306131 |
| 65 | 6  | 0 | 6.206282  | -4.106980 | -0.929441 |
| 66 | 8  | 0 | -5.462495 | 0.792202  | 1.483869  |
| 67 | 1  | 0 | 6.431310  | -1.833488 | 0.304614  |
| 68 | 1  | 0 | 6.780203  | 0.251652  | 1.399471  |
| 69 | 6  | 0 | 7.422184  | -0.149680 | -1.961773 |
| 70 | 6  | 0 | 7.537656  | 1.063216  | -1.363605 |
| 71 | 7  | 0 | 9.396961  | -0.193140 | -0.723014 |
| 72 | 6  | 0 | 10.677407 | -0.596212 | -0.139507 |
| 73 | 1  | 0 | 11.131080 | 0.288302  | 0.316068  |
| 74 | 1  | 0 | 10.539816 | -1.364620 | 0.628946  |
| 75 | 1  | 0 | 11.338052 | -0.992903 | -0.916963 |
| 76 | 6  | 0 | 8.606355  | -0.989887 | -1.574667 |
| 77 | 8  | 0 | 8.874545  | -2.161748 | -1.913295 |
| 78 | 6  | 0 | 8.797101  | 1.078981  | -0.548882 |
| 79 | 8  | 0 | 9.265492  | 1.993044  | 0.158250  |
| 80 | 1  | 0 | 6.655209  | -0.515187 | -2.627648 |
| 81 | 1  | 0 | 6.880328  | 1.917202  | -1.427115 |
| 82 | 29 | 0 | 3.022241  | -0.092453 | -0.013471 |
| 83 | 78 | 0 | -2.510043 | -0.537231 | -0.175243 |
| 84 | 1  | 0 | 6.027855  | -5.106607 | -0.592086 |
| 85 | 1  | 0 | 6.857790  | -4.127856 | -1.777970 |
| 86 | 1  | 0 | 6.661958  | -3.541375 | -0.143725 |

---

endo-P

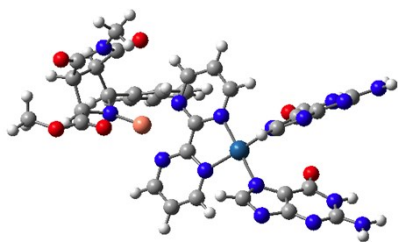

| Center Number | Atomic Number | Atomic Type | Coordinates (Angstroms) |           |           |
|---------------|---------------|-------------|-------------------------|-----------|-----------|
|               |               |             | X                       | Y         | Z         |
| 1             | 7             | 0           | -5.118480               | -3.672855 | -0.045110 |
| 2             | 6             | 0           | -3.818563               | -3.192991 | -0.161359 |
| 3             | 7             | 0           | -3.752407               | -1.928301 | 0.284464  |
| 4             | 6             | 0           | -5.061047               | -1.570048 | 0.682016  |
| 5             | 6             | 0           | -5.601284               | -0.371122 | 1.282814  |
| 6             | 7             | 0           | -7.029000               | -0.489262 | 1.446729  |
| 7             | 6             | 0           | -7.816657               | -1.553119 | 1.036523  |
| 8             | 7             | 0           | -9.169964               | -1.443747 | 1.137834  |
| 9             | 7             | 0           | -7.289112               | -2.671423 | 0.528797  |
| 10            | 6             | 0           | -5.936710               | -2.640094 | 0.406538  |
| 11            | 1             | 0           | -2.989468               | -3.754926 | -0.559125 |
| 12            | 1             | 0           | -7.448257               | 0.315788  | 1.902515  |
| 13            | 1             | 0           | -9.635665               | -0.622627 | 1.496283  |
| 14            | 1             | 0           | -9.725078               | -2.241211 | 0.858893  |
| 15            | 7             | 0           | -5.348737               | 0.621759  | -2.585128 |
| 16            | 6             | 0           | -4.283128               | -0.187072 | -2.234044 |
| 17            | 7             | 0           | -3.542569               | 0.398068  | -1.282924 |
| 18            | 6             | 0           | -4.120569               | 1.652041  | -1.034756 |
| 19            | 6             | 0           | -3.744699               | 2.718141  | -0.133127 |
| 20            | 8             | 0           | -2.729014               | 2.841594  | 0.575013  |
| 21            | 7             | 0           | -4.733517               | 3.765185  | -0.165018 |
| 22            | 6             | 0           | -5.866475               | 3.794215  | -0.961980 |
| 23            | 7             | 0           | -6.710006               | 4.861387  | -0.865954 |
| 24            | 7             | 0           | -6.163585               | 2.816884  | -1.826343 |
| 25            | 6             | 0           | -5.271013               | 1.789777  | -1.825470 |
| 26            | 1             | 0           | -4.073194               | -1.146942 | -2.672658 |
| 27            | 1             | 0           | -4.525980               | 4.529767  | 0.470965  |
| 28            | 1             | 0           | -6.505405               | 5.680204  | -0.312993 |
| 29            | 1             | 0           | -7.514124               | 4.870634  | -1.478492 |
| 30            | 6             | 0           | 0.560522                | -1.116975 | 0.672081  |
| 31            | 6             | 0           | -0.796565               | -2.827255 | 1.589392  |
| 32            | 6             | 0           | 0.340771                | -3.417224 | 2.144758  |
| 33            | 6             | 0           | 1.601012                | -2.764308 | 1.957496  |
| 34            | 1             | 0           | 0.280582                | -4.340931 | 2.700811  |
| 35            | 1             | 0           | 2.510040                | -3.161388 | 2.397476  |
| 36            | 6             | 0           | 0.642087                | 0.006758  | -0.131587 |
| 37            | 6             | 0           | -0.523616               | 1.632071  | -1.395224 |
| 38            | 6             | 0           | 0.686254                | 2.279871  | -1.656572 |
| 39            | 6             | 0           | 1.885821                | 1.712484  | -1.129770 |
| 40            | 1             | 0           | 0.715685                | 3.197145  | -2.228176 |
| 41            | 1             | 0           | 2.851505                | 2.171522  | -1.320422 |
| 42            | 7             | 0           | -0.571042               | 0.494420  | -0.661780 |
| 43            | 7             | 0           | 1.866692                | 0.614461  | -0.366620 |
| 44            | 7             | 0           | -0.721067               | -1.691900 | 0.847273  |
| 45            | 7             | 0           | 1.708914                | -1.652631 | 1.236096  |
| 46            | 7             | 0           | 5.251615                | -0.396928 | 0.870371  |
| 47            | 6             | 0           | 6.182516                | -1.282857 | 0.177325  |
| 48            | 6             | 0           | 5.438074                | -2.413409 | -0.547349 |
| 49            | 8             | 0           | 4.204563                | -2.383495 | -0.713102 |
| 50            | 6             | 0           | 6.087073                | 0.776472  | 1.197383  |
| 51            | 6             | 0           | 5.432463                | 1.881462  | 2.009299  |
| 52            | 6             | 0           | 4.149968                | 2.399363  | 1.735161  |
| 53            | 6             | 0           | 6.128920                | 2.388071  | 3.128029  |
| 54            | 6             | 0           | 3.584694                | 3.394009  | 2.550031  |
| 55            | 1             | 0           | 3.593155                | 2.034177  | 0.883922  |
| 56            | 6             | 0           | 5.571473                | 3.387833  | 3.944238  |
| 57            | 1             | 0           | 7.110818                | 1.989474  | 3.374793  |
| 58            | 6             | 0           | 4.291503                | 3.896006  | 3.658518  |
| 59            | 1             | 0           | 2.596953                | 3.783195  | 2.316736  |
| 60            | 1             | 0           | 6.133796                | 3.759135  | 4.795756  |

|    |    |   |           |           |           |
|----|----|---|-----------|-----------|-----------|
| 61 | 1  | 0 | 3.852143  | 4.669301  | 4.282478  |
| 62 | 8  | 0 | 6.120531  | -3.529653 | -0.946036 |
| 63 | 6  | 0 | 7.591548  | -3.583844 | -1.030254 |
| 64 | 1  | 0 | 7.817632  | -4.629944 | -1.236370 |
| 65 | 1  | 0 | 7.921869  | -2.951333 | -1.858418 |
| 66 | 1  | 0 | 8.055863  | -3.283980 | -0.083990 |
| 67 | 8  | 0 | -5.036952 | 0.682511  | 1.643675  |
| 68 | 1  | 0 | 6.901682  | -1.749855 | 0.878082  |
| 69 | 1  | 0 | 6.957830  | 0.446892  | 1.801470  |
| 70 | 6  | 0 | 7.085373  | -0.314409 | -0.757176 |
| 71 | 6  | 0 | 6.731055  | 1.097617  | -0.212228 |
| 72 | 1  | 0 | 8.142251  | -0.577001 | -0.694932 |
| 73 | 1  | 0 | 7.592190  | 1.771384  | -0.136535 |
| 74 | 7  | 0 | 5.785077  | 0.784202  | -2.384209 |
| 75 | 6  | 0 | 5.047645  | 1.026228  | -3.625794 |
| 76 | 1  | 0 | 4.899581  | 2.100398  | -3.743927 |
| 77 | 1  | 0 | 5.627158  | 0.626080  | -4.460672 |
| 78 | 1  | 0 | 4.073489  | 0.526172  | -3.600443 |
| 79 | 6  | 0 | 6.623036  | -0.320236 | -2.200879 |
| 80 | 8  | 0 | 6.891960  | -1.159936 | -3.083793 |
| 81 | 6  | 0 | 5.758124  | 1.644755  | -1.267562 |
| 82 | 8  | 0 | 5.064766  | 2.678949  | -1.229951 |
| 83 | 78 | 0 | -2.158659 | -0.657480 | -0.159336 |
| 84 | 29 | 0 | 3.362006  | -0.583738 | 0.632442  |
| 85 | 1  | 0 | -1.751772 | -3.280983 | 1.752521  |
| 86 | 1  | 0 | -1.432179 | 2.043452  | -1.782753 |

### exo-P

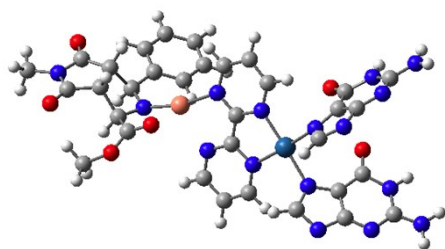

| Center Number | Atomic Number | Atomic Type | Coordinates (Angstroms) |           |           |
|---------------|---------------|-------------|-------------------------|-----------|-----------|
|               |               |             | X                       | Y         | Z         |
| 1             | 7             | 0           | -5.194809               | -3.732651 | 0.485084  |
| 2             | 6             | 0           | -3.958988               | -3.170017 | 0.189262  |
| 3             | 7             | 0           | -3.975402               | -1.851845 | 0.441948  |
| 4             | 6             | 0           | -5.283385               | -1.542228 | 0.887744  |
| 5             | 6             | 0           | -5.903960               | -0.310635 | 1.324277  |
| 6             | 7             | 0           | -7.290224               | -0.524809 | 1.649333  |
| 7             | 6             | 0           | -7.988326               | -1.715191 | 1.518508  |
| 8             | 7             | 0           | -9.320260               | -1.725502 | 1.792604  |
| 9             | 7             | 0           | -7.391467               | -2.845361 | 1.128699  |
| 10            | 6             | 0           | -6.068518               | -2.712189 | 0.858358  |
| 11            | 1             | 0           | -3.112829               | -3.721810 | -0.185418 |
| 12            | 1             | 0           | -7.754319               | 0.307412  | 2.004705  |
| 13            | 1             | 0           | -9.842869               | -0.893094 | 2.022029  |
| 14            | 1             | 0           | -9.801879               | -2.613542 | 1.749342  |
| 15            | 7             | 0           | -5.707521               | 0.350501  | -2.697020 |
| 16            | 6             | 0           | -4.614308               | -0.365128 | -2.243820 |
| 17            | 7             | 0           | -3.925731               | 0.342189  | -1.339937 |
| 18            | 6             | 0           | -4.570382               | 1.581546  | -1.221561 |
| 19            | 6             | 0           | -4.271807               | 2.730120  | -0.394426 |
| 20            | 8             | 0           | -3.279733               | 2.951695  | 0.324880  |
| 21            | 7             | 0           | -5.308919               | 3.716402  | -0.521838 |
| 22            | 6             | 0           | -6.426465               | 3.617974  | -1.337779 |
| 23            | 7             | 0           | -7.320088               | 4.647522  | -1.325334 |
| 24            | 7             | 0           | -6.654357               | 2.564381  | -2.132440 |
| 25            | 6             | 0           | -5.711664               | 1.586539  | -2.040134 |
| 26            | 1             | 0           | -4.350533               | -1.352835 | -2.581169 |
| 27            | 1             | 0           | -5.167126               | 4.535596  | 0.065356  |

|    |    |   |           |           |           |
|----|----|---|-----------|-----------|-----------|
| 28 | 1  | 0 | -7.158030 | 5.504526  | -0.817120 |
| 29 | 1  | 0 | -8.121108 | 4.584913  | -1.938382 |
| 30 | 6  | 0 | 0.318767  | -0.836554 | 0.566973  |
| 31 | 6  | 0 | -0.928128 | -2.524597 | 1.661254  |
| 32 | 6  | 0 | 0.251997  | -3.026580 | 2.203153  |
| 33 | 1  | 0 | -1.888941 | -2.965248 | 1.896129  |
| 34 | 6  | 0 | 1.474159  | -2.344573 | 1.899515  |
| 35 | 1  | 0 | 0.252336  | -3.895889 | 2.843974  |
| 36 | 1  | 0 | 2.421330  | -2.670182 | 2.316094  |
| 37 | 6  | 0 | 0.303591  | 0.277634  | -0.285494 |
| 38 | 6  | 0 | -1.023869 | 1.770306  | -1.551559 |
| 39 | 6  | 0 | 0.116024  | 2.522419  | -1.845267 |
| 40 | 1  | 0 | -2.000572 | 2.041815  | -1.920511 |
| 41 | 6  | 0 | 1.360970  | 2.082386  | -1.325476 |
| 42 | 1  | 0 | 0.058252  | 3.420099  | -2.444892 |
| 43 | 1  | 0 | 2.275202  | 2.631135  | -1.517019 |
| 44 | 7  | 0 | -0.949410 | 0.656667  | -0.781935 |
| 45 | 7  | 0 | 1.463902  | 0.974642  | -0.574042 |
| 46 | 7  | 0 | -0.927031 | -1.443117 | 0.828669  |
| 47 | 7  | 0 | 1.498468  | -1.279932 | 1.105330  |
| 48 | 7  | 0 | 4.950567  | -0.316379 | 0.485453  |
| 49 | 6  | 0 | 5.644704  | -1.319982 | -0.318587 |
| 50 | 6  | 0 | 4.641177  | -2.142225 | -1.136087 |
| 51 | 8  | 0 | 3.551406  | -1.659432 | -1.507969 |
| 52 | 6  | 0 | 6.018067  | 0.575934  | 0.944825  |
| 53 | 6  | 0 | 5.559510  | 1.847018  | 1.659214  |
| 54 | 6  | 0 | 4.241023  | 1.999250  | 2.139010  |
| 55 | 6  | 0 | 6.486503  | 2.884914  | 1.913066  |
| 56 | 6  | 0 | 3.845161  | 3.171462  | 2.811733  |
| 57 | 1  | 0 | 3.529519  | 1.189400  | 2.010688  |
| 58 | 6  | 0 | 6.093924  | 4.050933  | 2.592137  |
| 59 | 1  | 0 | 7.516684  | 2.783216  | 1.584509  |
| 60 | 6  | 0 | 4.768150  | 4.207753  | 3.035673  |
| 61 | 1  | 0 | 2.823902  | 3.266756  | 3.174189  |
| 62 | 1  | 0 | 6.826313  | 4.829312  | 2.784546  |
| 63 | 1  | 0 | 4.466518  | 5.113703  | 3.553325  |
| 64 | 8  | 0 | 4.888959  | -3.448640 | -1.454506 |
| 65 | 6  | 0 | 6.110137  | -4.185191 | -1.061709 |
| 66 | 1  | 0 | 5.954672  | -5.186185 | -1.466998 |
| 67 | 1  | 0 | 6.995214  | -3.722818 | -1.503494 |
| 68 | 1  | 0 | 6.191703  | -4.234555 | 0.029918  |
| 69 | 8  | 0 | -5.430723 | 0.838537  | 1.433808  |
| 70 | 1  | 0 | 6.257040  | -2.006050 | 0.296095  |
| 71 | 1  | 0 | 6.694978  | 0.037943  | 1.645755  |
| 72 | 6  | 0 | 6.658191  | -0.464933 | -1.222312 |
| 73 | 6  | 0 | 6.881965  | 0.822968  | -0.385803 |
| 74 | 7  | 0 | 8.982370  | -0.226373 | -0.807778 |
| 75 | 6  | 0 | 10.426565 | -0.484569 | -0.798778 |
| 76 | 1  | 0 | 10.932568 | 0.445237  | -0.527818 |
| 77 | 1  | 0 | 10.679600 | -1.260451 | -0.067490 |
| 78 | 1  | 0 | 10.745151 | -0.819905 | -1.789377 |
| 79 | 6  | 0 | 8.045274  | -1.062190 | -1.424152 |
| 80 | 8  | 0 | 8.343082  | -2.121445 | -2.017581 |
| 81 | 6  | 0 | 8.395195  | 0.916491  | -0.217295 |
| 82 | 8  | 0 | 9.066539  | 1.807515  | 0.335895  |
| 83 | 1  | 0 | 6.200983  | -0.270575 | -2.196070 |
| 84 | 1  | 0 | 6.505439  | 1.723859  | -0.875598 |
| 85 | 29 | 0 | 3.142408  | 0.106850  | -0.016040 |
| 86 | 78 | 0 | -2.464531 | -0.546459 | -0.168214 |

-----

**endo-TS**

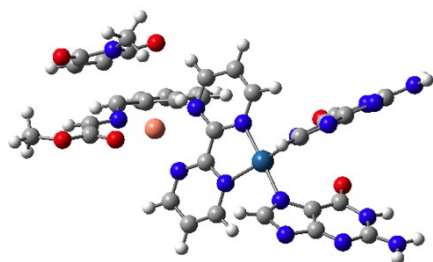

| Center Number | Atomic Number | Atomic Type | Coordinates (Angstroms) |           |           |
|---------------|---------------|-------------|-------------------------|-----------|-----------|
|               |               |             | X                       | Y         | Z         |
| 1             | 7             | 0           | -5.090349               | -3.665246 | -0.114357 |
| 2             | 6             | 0           | -3.797219               | -3.171730 | -0.221366 |
| 3             | 7             | 0           | -3.742600               | -1.921521 | 0.264651  |
| 4             | 6             | 0           | -5.050552               | -1.588210 | 0.679615  |
| 5             | 6             | 0           | -5.595112               | -0.408921 | 1.314635  |
| 6             | 7             | 0           | -7.017953               | -0.546149 | 1.493345  |
| 7             | 6             | 0           | -7.799541               | -1.608178 | 1.063171  |
| 8             | 7             | 0           | -9.151121               | -1.517931 | 1.185820  |
| 9             | 7             | 0           | -7.266329               | -2.706907 | 0.517188  |
| 10            | 6             | 0           | -5.917415               | -2.658220 | 0.379092  |
| 11            | 1             | 0           | -2.966271               | -3.714194 | -0.642180 |
| 12            | 1             | 0           | -7.441355               | 0.239394  | 1.978834  |
| 13            | 1             | 0           | -9.622446               | -0.711418 | 1.569664  |
| 14            | 1             | 0           | -9.700927               | -2.312944 | 0.889140  |
| 15            | 7             | 0           | -5.263467               | 0.663937  | -2.649751 |
| 16            | 6             | 0           | -4.211386               | -0.134344 | -2.245769 |
| 17            | 7             | 0           | -3.544499               | 0.442562  | -1.237112 |
| 18            | 6             | 0           | -4.157838               | 1.681404  | -1.002190 |
| 19            | 6             | 0           | -3.857980               | 2.729544  | -0.052872 |
| 20            | 8             | 0           | -2.897376               | 2.835143  | 0.730744  |
| 21            | 7             | 0           | -4.851054               | 3.768358  | -0.131900 |
| 22            | 6             | 0           | -5.907112               | 3.819657  | -1.029461 |
| 23            | 7             | 0           | -6.741351               | 4.896565  | -0.995999 |
| 24            | 7             | 0           | -6.135845               | 2.854118  | -1.928695 |
| 25            | 6             | 0           | -5.251411               | 1.823046  | -1.870570 |
| 26            | 1             | 0           | -3.962048               | -1.084094 | -2.687232 |
| 27            | 1             | 0           | -4.717864               | 4.507022  | 0.553082  |
| 28            | 1             | 0           | -6.570999               | 5.710579  | -0.423991 |
| 29            | 1             | 0           | -7.489837               | 4.925063  | -1.675376 |
| 30            | 6             | 0           | 0.558272                | -1.113176 | 0.667395  |
| 31            | 6             | 0           | -0.789706               | -2.835222 | 1.561035  |
| 32            | 6             | 0           | 0.355179                | -3.443463 | 2.074782  |
| 33            | 1             | 0           | -1.776525               | -3.252659 | 1.719285  |
| 34            | 6             | 0           | 1.613976                | -2.795953 | 1.873213  |
| 35            | 1             | 0           | 0.298650                | -4.374977 | 2.619837  |
| 36            | 1             | 0           | 2.533493                | -3.215078 | 2.266649  |
| 37            | 6             | 0           | 0.627192                | 0.055865  | -0.109723 |
| 38            | 6             | 0           | -0.555844               | 1.737557  | -1.264246 |
| 39            | 6             | 0           | 0.651959                | 2.381118  | -1.535781 |
| 40            | 1             | 0           | -1.502654               | 2.140716  | -1.593027 |
| 41            | 6             | 0           | 1.862160                | 1.788023  | -1.073901 |
| 42            | 1             | 0           | 0.672929                | 3.311226  | -2.088236 |
| 43            | 1             | 0           | 2.837444                | 2.238279  | -1.252011 |
| 44            | 7             | 0           | -0.585452               | 0.569749  | -0.568225 |
| 45            | 7             | 0           | 1.845098                | 0.637366  | -0.377809 |
| 46            | 7             | 0           | -0.712766               | -1.679856 | 0.840931  |
| 47            | 7             | 0           | 1.706583                | -1.648593 | 1.199187  |
| 48            | 7             | 0           | 5.336477                | -0.484482 | 0.773126  |
| 49            | 6             | 0           | 6.031105                | -1.508696 | 0.237967  |
| 50            | 6             | 0           | 5.290446                | -2.470820 | -0.581929 |
| 51            | 8             | 0           | 4.037009                | -2.375033 | -0.742676 |
| 52            | 6             | 0           | 6.106287                | 0.544036  | 1.310775  |
| 53            | 6             | 0           | 5.506729                | 1.615794  | 2.161101  |
| 54            | 6             | 0           | 4.192980                | 2.108779  | 1.994456  |
| 55            | 6             | 0           | 6.315613                | 2.200949  | 3.164005  |
| 56            | 6             | 0           | 3.706323                | 3.148104  | 2.800629  |
| 57            | 1             | 0           | 3.559791                | 1.695536  | 1.219490  |
| 58            | 6             | 0           | 5.831006                | 3.243684  | 3.972374  |
| 59            | 1             | 0           | 7.328418                | 1.833634  | 3.318142  |
| 60            | 6             | 0           | 4.519924                | 3.723535  | 3.794383  |

|    |    |   |           |           |           |
|----|----|---|-----------|-----------|-----------|
| 61 | 1  | 0 | 2.698517  | 3.524507  | 2.644983  |
| 62 | 1  | 0 | 6.474332  | 3.679389  | 4.731434  |
| 63 | 1  | 0 | 4.138648  | 4.536350  | 4.405632  |
| 64 | 8  | 0 | 5.931407  | -3.521423 | -1.176083 |
| 65 | 8  | 0 | -5.030432 | 0.639307  | 1.689509  |
| 66 | 1  | 0 | 7.054466  | -1.711452 | 0.533869  |
| 67 | 1  | 0 | 7.085289  | 0.222564  | 1.690614  |
| 68 | 6  | 0 | 7.560861  | 0.280521  | -1.039649 |
| 69 | 6  | 0 | 6.879788  | 1.314088  | -0.328510 |
| 70 | 1  | 0 | 8.538474  | -0.122452 | -0.824897 |
| 71 | 1  | 0 | 7.391923  | 2.127131  | 0.180897  |
| 72 | 7  | 0 | 5.707833  | 0.846061  | -2.301123 |
| 73 | 6  | 0 | 4.805204  | 0.930909  | -3.442258 |
| 74 | 1  | 0 | 4.679318  | 1.977075  | -3.738046 |
| 75 | 1  | 0 | 5.258884  | 0.367895  | -4.261385 |
| 76 | 1  | 0 | 3.822646  | 0.501285  | -3.217141 |
| 77 | 6  | 0 | 6.851405  | -0.041400 | -2.258054 |
| 78 | 8  | 0 | 7.098128  | -0.862919 | -3.179888 |
| 79 | 6  | 0 | 5.704172  | 1.705056  | -1.212948 |
| 80 | 8  | 0 | 4.857874  | 2.620999  | -1.034328 |
| 81 | 78 | 0 | -2.168225 | -0.616823 | -0.115364 |
| 82 | 29 | 0 | 3.367877  | -0.569478 | 0.368497  |
| 83 | 6  | 0 | 7.320994  | -3.858237 | -1.153605 |
| 84 | 1  | 0 | 7.484636  | -4.736672 | -1.742225 |
| 85 | 1  | 0 | 7.891077  | -3.047449 | -1.556753 |
| 86 | 1  | 0 | 7.627030  | -4.042611 | -0.145018 |

-----

### exo-TS

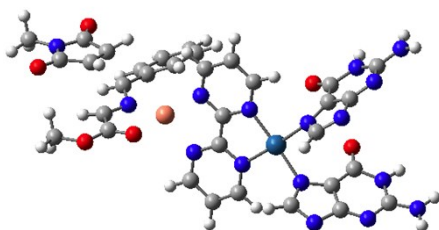

| Center Number | Atomic Number | Atomic Type | Coordinates (Angstroms) |           |           |
|---------------|---------------|-------------|-------------------------|-----------|-----------|
|               |               |             | X                       | Y         | Z         |
| 1             | 7             | 0           | -5.499657               | -3.589472 | 0.268431  |
| 2             | 6             | 0           | -4.193418               | -3.138933 | 0.118090  |
| 3             | 7             | 0           | -4.108253               | -1.840664 | 0.450936  |
| 4             | 6             | 0           | -5.413595               | -1.431349 | 0.808278  |
| 5             | 6             | 0           | -5.937496               | -0.176222 | 1.296132  |
| 6             | 7             | 0           | -7.365509               | -0.256347 | 1.466588  |
| 7             | 6             | 0           | -8.169432               | -1.337371 | 1.137121  |
| 8             | 7             | 0           | -9.519450               | -1.193834 | 1.219045  |
| 9             | 7             | 0           | -7.656797               | -2.503559 | 0.730449  |
| 10            | 6             | 0           | -6.303891               | -2.506396 | 0.622313  |
| 11            | 1             | 0           | -3.371786               | -3.746689 | -0.222750 |
| 12            | 1             | 0           | -7.778503               | 0.576849  | 1.874920  |
| 13            | 1             | 0           | -9.969458               | -0.336322 | 1.506057  |
| 14            | 1             | 0           | -10.091410              | -1.998069 | 0.999600  |
| 15            | 7             | 0           | -5.713394               | 0.663241  | -2.509190 |
| 16            | 6             | 0           | -4.709159               | -0.193701 | -2.107254 |
| 17            | 7             | 0           | -3.892640               | 0.412326  | -1.237043 |
| 18            | 6             | 0           | -4.356430               | 1.728130  | -1.092509 |
| 19            | 6             | 0           | -3.870388               | 2.829662  | -0.291088 |
| 20            | 8             | 0           | -2.837484               | 2.909707  | 0.399579  |
| 21            | 7             | 0           | -4.754107               | 3.958765  | -0.408895 |
| 22            | 6             | 0           | -5.899838               | 4.016314  | -1.188767 |
| 23            | 7             | 0           | -6.636009               | 5.162005  | -1.181071 |
| 24            | 7             | 0           | -6.308997               | 2.991138  | -1.948731 |
| 25            | 6             | 0           | -5.514237               | 1.891417  | -1.868736 |
| 26            | 1             | 0           | -4.588116               | -1.202547 | -2.460014 |

|    |    |   |           |           |           |
|----|----|---|-----------|-----------|-----------|
| 27 | 1  | 0 | -4.468801 | 4.758455  | 0.152039  |
| 28 | 1  | 0 | -6.356148 | 5.997178  | -0.687966 |
| 29 | 1  | 0 | -7.453521 | 5.193786  | -1.774653 |
| 30 | 6  | 0 | 0.255119  | -1.158639 | 0.537155  |
| 31 | 6  | 0 | -1.091898 | -2.720463 | 1.685943  |
| 32 | 6  | 0 | 0.062316  | -3.307271 | 2.203867  |
| 33 | 1  | 0 | -2.080094 | -3.079668 | 1.944834  |
| 34 | 6  | 0 | 1.326439  | -2.739967 | 1.858305  |
| 35 | 1  | 0 | 0.009938  | -4.158887 | 2.865203  |
| 36 | 1  | 0 | 2.252173  | -3.150750 | 2.245310  |
| 37 | 6  | 0 | 0.317148  | -0.092866 | -0.374395 |
| 38 | 6  | 0 | -0.874157 | 1.414409  | -1.745029 |
| 39 | 6  | 0 | 0.337057  | 1.936008  | -2.202214 |
| 40 | 1  | 0 | -1.823952 | 1.792544  | -2.093621 |
| 41 | 6  | 0 | 1.544672  | 1.382534  | -1.691052 |
| 42 | 1  | 0 | 0.359371  | 2.737256  | -2.927505 |
| 43 | 1  | 0 | 2.512100  | 1.738204  | -2.023937 |
| 44 | 7  | 0 | -0.902558 | 0.395529  | -0.846429 |
| 45 | 7  | 0 | 1.538660  | 0.393653  | -0.785972 |
| 46 | 7  | 0 | -1.020973 | -1.657326 | 0.836006  |
| 47 | 7  | 0 | 1.416807  | -1.676844 | 1.056121  |
| 48 | 7  | 0 | 5.031437  | -0.560352 | 0.510720  |
| 49 | 6  | 0 | 5.740965  | -1.541640 | -0.103428 |
| 50 | 6  | 0 | 4.991383  | -2.520025 | -0.892034 |
| 51 | 8  | 0 | 3.734507  | -2.419446 | -1.051533 |
| 52 | 6  | 0 | 5.806041  | 0.462116  | 1.040453  |
| 53 | 6  | 0 | 5.206961  | 1.588650  | 1.813674  |
| 54 | 6  | 0 | 4.011263  | 2.239029  | 1.427739  |
| 55 | 6  | 0 | 5.905903  | 2.085736  | 2.936840  |
| 56 | 6  | 0 | 3.531382  | 3.346421  | 2.147561  |
| 57 | 1  | 0 | 3.465878  | 1.885729  | 0.556146  |
| 58 | 6  | 0 | 5.423895  | 3.186316  | 3.664015  |
| 59 | 1  | 0 | 6.840225  | 1.616018  | 3.230933  |
| 60 | 6  | 0 | 4.233313  | 3.824245  | 3.271545  |
| 61 | 1  | 0 | 2.620040  | 3.848033  | 1.831226  |
| 62 | 1  | 0 | 5.979728  | 3.550096  | 4.523489  |
| 63 | 8  | 0 | 5.614285  | -3.585315 | -1.479321 |
| 64 | 6  | 0 | 7.083533  | -3.756670 | -1.432323 |
| 65 | 1  | 0 | 7.271575  | -4.634699 | -2.051049 |
| 66 | 1  | 0 | 7.596342  | -2.885807 | -1.850873 |
| 67 | 1  | 0 | 7.409961  | -3.951859 | -0.403763 |
| 68 | 8  | 0 | -5.345866 | 0.889856  | 1.559201  |
| 69 | 1  | 0 | 6.765917  | -1.755679 | 0.185003  |
| 70 | 1  | 0 | 6.763244  | 0.135169  | 1.465992  |
| 71 | 6  | 0 | 6.777825  | 0.166227  | -1.581727 |
| 72 | 6  | 0 | 6.581339  | 1.214673  | -0.629786 |
| 73 | 1  | 0 | 6.102644  | -0.131536 | -2.369307 |
| 74 | 1  | 0 | 5.849064  | 2.003895  | -0.762304 |
| 75 | 7  | 0 | 8.870232  | 0.721300  | -0.733569 |
| 76 | 6  | 0 | 10.315755 | 0.742658  | -0.531212 |
| 77 | 1  | 0 | 10.551453 | 0.846653  | 0.531369  |
| 78 | 1  | 0 | 10.724261 | -0.194591 | -0.917154 |
| 79 | 1  | 0 | 10.776063 | 1.576485  | -1.071175 |
| 80 | 6  | 0 | 8.201547  | -0.166409 | -1.634367 |
| 81 | 8  | 0 | 8.805977  | -1.052424 | -2.292768 |
| 82 | 6  | 0 | 7.964671  | 1.636468  | -0.174062 |
| 83 | 8  | 0 | 8.278365  | 2.576233  | 0.586446  |
| 84 | 78 | 0 | -2.499386 | -0.639849 | -0.139099 |
| 85 | 29 | 0 | 3.074561  | -0.678964 | 0.088732  |
| 86 | 1  | 0 | 3.864263  | 4.664580  | 3.821581  |

### endo-RC-(Cu-bipym)

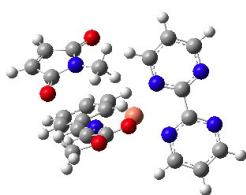



| Center<br>Number | Atomic<br>Number | Atomic<br>Type | Coordinates (Angstroms) |           |           |
|------------------|------------------|----------------|-------------------------|-----------|-----------|
|                  |                  |                | X                       | Y         | Z         |
| 1                | 6                | 0              | 3.622808                | -0.718940 | 0.120685  |
| 2                | 6                | 0              | 5.438528                | -1.374453 | -1.147039 |
| 3                | 6                | 0              | 4.634024                | -1.432349 | -2.300652 |
| 4                | 1                | 0              | 6.496762                | -1.612961 | -1.174161 |
| 5                | 6                | 0              | 3.280054                | -1.092503 | -2.155474 |
| 6                | 1                | 0              | 5.039433                | -1.725497 | -3.261050 |
| 7                | 1                | 0              | 2.594177                | -1.116228 | -2.993907 |
| 8                | 6                | 0              | 3.016609                | -0.366929 | 1.438471  |
| 9                | 6                | 0              | 3.223417                | -0.007365 | 3.710842  |
| 10               | 6                | 0              | 1.837296                | 0.199340  | 3.820983  |
| 11               | 1                | 0              | 3.883464                | 0.050146  | 4.569427  |
| 12               | 6                | 0              | 1.073991                | 0.121693  | 2.643857  |
| 13               | 1                | 0              | 1.366141                | 0.413999  | 4.772209  |
| 14               | 1                | 0              | 0.000990                | 0.279589  | 2.659551  |
| 15               | 7                | 0              | 3.811290                | -0.293555 | 2.522818  |
| 16               | 7                | 0              | 1.661655                | -0.155966 | 1.447471  |
| 17               | 7                | 0              | 4.934447                | -1.023866 | 0.060898  |
| 18               | 7                | 0              | 2.772280                | -0.727411 | -0.950625 |
| 19               | 7                | 0              | -0.879106               | 0.214709  | -1.446018 |
| 20               | 6                | 0              | -1.637297               | -0.847581 | -1.838309 |
| 21               | 6                | 0              | -1.175249               | -2.187018 | -1.476905 |
| 22               | 8                | 0              | -0.118474               | -2.323462 | -0.793742 |
| 23               | 6                | 0              | -1.299281               | 1.448643  | -1.813489 |
| 24               | 6                | 0              | -0.690149               | 2.708914  | -1.483307 |
| 25               | 6                | 0              | 0.467572                | 2.853797  | -0.663132 |
| 26               | 6                | 0              | -1.306785               | 3.885571  | -2.009885 |
| 27               | 6                | 0              | 0.975990                | 4.124666  | -0.382178 |
| 28               | 1                | 0              | 0.951474                | 1.973308  | -0.249929 |
| 29               | 6                | 0              | -0.790199               | 5.153423  | -1.727339 |
| 30               | 1                | 0              | -2.188907               | 3.788549  | -2.638425 |
| 31               | 6                | 0              | 0.352691                | 5.278237  | -0.908869 |
| 32               | 1                | 0              | 1.855762                | 4.230304  | 0.244205  |
| 33               | 1                | 0              | -1.266892               | 6.038789  | -2.135244 |
| 34               | 1                | 0              | 0.755147                | 6.261268  | -0.682395 |
| 35               | 8                | 0              | -1.854333               | -3.293384 | -1.867371 |
| 36               | 1                | 0              | -2.557280               | -0.697162 | -2.396146 |
| 37               | 1                | 0              | -2.199672               | 1.505579  | -2.434642 |
| 38               | 6                | 0              | -4.929157               | 0.463610  | 0.933582  |
| 39               | 6                | 0              | -4.183539               | 1.161989  | 1.818137  |
| 40               | 1                | 0              | -5.827108               | 0.757987  | 0.408936  |
| 41               | 1                | 0              | -4.326070               | 2.164781  | 2.194926  |
| 42               | 7                | 0              | -3.189521               | -0.942642 | 1.611341  |
| 43               | 6                | 0              | -2.338366               | -2.120475 | 1.826235  |
| 44               | 1                | 0              | -2.328106               | -2.386036 | 2.886803  |
| 45               | 1                | 0              | -2.757896               | -2.949564 | 1.252648  |
| 46               | 1                | 0              | -1.314936               | -1.940474 | 1.486936  |
| 47               | 6                | 0              | -4.301338               | -0.892788 | 0.743671  |
| 48               | 8                | 0              | -4.640257               | -1.792990 | -0.046177 |
| 49               | 6                | 0              | -3.028896               | 0.297980  | 2.254559  |
| 50               | 8                | 0              | -2.078657               | 0.601802  | 3.001376  |
| 51               | 6                | 0              | -3.131031               | -3.225409 | -2.615476 |
| 52               | 1                | 0              | -3.369597               | -4.265741 | -2.828718 |
| 53               | 1                | 0              | -3.903419               | -2.779155 | -1.983908 |
| 54               | 1                | 0              | -2.997355               | -2.678300 | -3.555035 |
| 55               | 29               | 0              | 0.799316                | -0.377245 | -0.412061 |

**exo-RC-(Cu-bipym)**

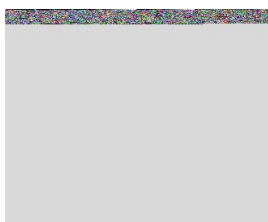

| Center<br>Number | Atomic<br>Number | Atomic<br>Type | Coordinates (Angstroms) |           |           |
|------------------|------------------|----------------|-------------------------|-----------|-----------|
|                  |                  |                | X                       | Y         | Z         |
| 1                | 6                | 0              | 4.237324                | -0.771863 | 0.350371  |
| 2                | 6                | 0              | 6.111374                | -1.304049 | -0.888293 |
| 3                | 6                | 0              | 5.375504                | -1.186026 | -2.082203 |
| 4                | 1                | 0              | 7.162908                | -1.569813 | -0.888518 |
| 5                | 6                | 0              | 4.019422                | -0.842532 | -1.969951 |
| 6                | 1                | 0              | 5.832395                | -1.353632 | -3.049421 |
| 7                | 1                | 0              | 3.387036                | -0.731720 | -2.842869 |
| 8                | 6                | 0              | 3.560408                | -0.574903 | 1.665613  |
| 9                | 6                | 0              | 3.627975                | -0.479486 | 3.973550  |
| 10               | 6                | 0              | 2.236691                | -0.269953 | 4.023284  |
| 11               | 1                | 0              | 4.231381                | -0.528146 | 4.873808  |
| 12               | 6                | 0              | 1.553828                | -0.215087 | 2.799432  |
| 13               | 1                | 0              | 1.711546                | -0.157853 | 4.963462  |
| 14               | 1                | 0              | 0.483535                | -0.055405 | 2.750787  |
| 15               | 7                | 0              | 4.286964                | -0.633911 | 2.799543  |
| 16               | 7                | 0              | 2.208406                | -0.358771 | 1.618464  |
| 17               | 7                | 0              | 5.545144                | -1.095110 | 0.325439  |
| 18               | 7                | 0              | 3.445567                | -0.634370 | -0.757498 |
| 19               | 7                | 0              | -0.221985               | 0.270887  | -1.294367 |
| 20               | 6                | 0              | -0.989675               | -0.758960 | -1.744208 |
| 21               | 6                | 0              | -0.539128               | -2.121243 | -1.446006 |
| 22               | 8                | 0              | 0.521181                | -2.302308 | -0.780317 |
| 23               | 6                | 0              | -0.606995               | 1.528308  | -1.615509 |
| 24               | 6                | 0              | -0.018297               | 2.758468  | -1.152123 |
| 25               | 6                | 0              | 0.996127                | 2.838381  | -0.153047 |
| 26               | 6                | 0              | -0.509762               | 3.971018  | -1.723363 |
| 27               | 6                | 0              | 1.494318                | 4.082150  | 0.246083  |
| 28               | 1                | 0              | 1.378456                | 1.929707  | 0.303519  |
| 29               | 6                | 0              | 0.005318                | 5.210430  | -1.329890 |
| 30               | 1                | 0              | -1.290380               | 3.926529  | -2.479238 |
| 31               | 6                | 0              | 1.009371                | 5.271631  | -0.341569 |
| 32               | 1                | 0              | 2.258943                | 4.141198  | 1.013607  |
| 33               | 1                | 0              | -0.369395               | 6.123107  | -1.781230 |
| 34               | 8                | 0              | -1.230600               | -3.200435 | -1.888345 |
| 35               | 6                | 0              | -2.494493               | -3.087426 | -2.651824 |
| 36               | 1                | 0              | -2.844893               | -4.115368 | -2.737049 |
| 37               | 1                | 0              | -3.217062               | -2.478686 | -2.102964 |
| 38               | 1                | 0              | -2.296069               | -2.679336 | -3.648861 |
| 39               | 1                | 0              | -1.920885               | -0.570269 | -2.268429 |
| 40               | 1                | 0              | -1.454688               | 1.632598  | -2.298922 |
| 41               | 6                | 0              | -4.355803               | -0.832078 | 1.810833  |
| 42               | 6                | 0              | -5.437131               | -0.477417 | 2.537928  |
| 43               | 1                | 0              | -3.389895               | -1.182176 | 2.145631  |
| 44               | 1                | 0              | -5.568491               | -0.454038 | 3.610546  |
| 45               | 7                | 0              | -6.013732               | -0.264666 | 0.276657  |
| 46               | 6                | 0              | -6.778695               | -0.045324 | -0.954601 |
| 47               | 1                | 0              | -6.462138               | 0.872048  | -1.460873 |
| 48               | 1                | 0              | -6.647962               | -0.893166 | -1.632910 |
| 49               | 1                | 0              | -7.833011               | 0.046111  | -0.683461 |
| 50               | 6                | 0              | -4.688516               | -0.696499 | 0.348185  |
| 51               | 8                | 0              | -3.936608               | -0.925542 | -0.627191 |
| 52               | 6                | 0              | -6.545106               | -0.099628 | 1.588298  |
| 53               | 8                | 0              | -7.695023               | 0.275832  | 1.850662  |
| 54               | 1                | 0              | 1.406951                | 6.231900  | -0.027813 |
| 55               | 29               | 0              | 1.442525                | -0.389305 | -0.300720 |

**endo-P-(Cu-bipym)**

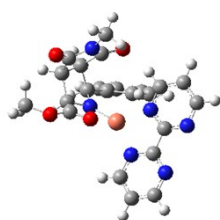

| Center<br>Number | Atomic<br>Number | Atomic<br>Type | Coordinates (Angstroms) |           |           |
|------------------|------------------|----------------|-------------------------|-----------|-----------|
|                  |                  |                | X                       | Y         | Z         |
| 1                | 6                | 0              | 3.569470                | -0.519436 | -0.094880 |
| 2                | 6                | 0              | 5.273866                | -1.364265 | -1.400651 |
| 3                | 6                | 0              | 4.391834                | -1.519978 | -2.486774 |
| 4                | 1                | 0              | 6.321431                | -1.636398 | -1.470966 |
| 5                | 6                | 0              | 3.055173                | -1.141382 | -2.287719 |
| 6                | 1                | 0              | 4.726741                | -1.915970 | -3.437449 |
| 7                | 1                | 0              | 2.311627                | -1.230310 | -3.070327 |
| 8                | 6                | 0              | 3.060115                | 0.047141  | 1.186608  |
| 9                | 6                | 0              | 3.411043                | 0.825516  | 3.330127  |
| 10               | 6                | 0              | 2.045161                | 1.135666  | 3.459346  |
| 11               | 1                | 0              | 4.120044                | 1.014352  | 4.128584  |
| 12               | 6                | 0              | 1.209061                | 0.855726  | 2.366119  |
| 13               | 1                | 0              | 1.646633                | 1.578016  | 4.363881  |
| 14               | 1                | 0              | 0.147967                | 1.082535  | 2.388618  |
| 15               | 7                | 0              | 3.918088                | 0.283303  | 2.194500  |
| 16               | 7                | 0              | 1.716708                | 0.308675  | 1.228986  |
| 17               | 7                | 0              | 4.864071                | -0.864511 | -0.208239 |
| 18               | 7                | 0              | 2.645225                | -0.641466 | -1.095309 |
| 19               | 7                | 0              | -1.022345               | -0.075157 | -1.132864 |
| 20               | 6                | 0              | -1.869427               | -1.293248 | -1.201204 |
| 21               | 6                | 0              | -1.058083               | -2.527100 | -0.777926 |
| 22               | 8                | 0              | 0.070108                | -2.382258 | -0.258076 |
| 23               | 6                | 0              | -2.009841               | 1.037200  | -1.196084 |
| 24               | 6                | 0              | -1.495895               | 2.464808  | -1.198020 |
| 25               | 6                | 0              | -0.393375               | 2.917664  | -0.446819 |
| 26               | 6                | 0              | -2.178582               | 3.389461  | -2.019207 |
| 27               | 6                | 0              | 0.023027                | 4.257732  | -0.525966 |
| 28               | 1                | 0              | 0.134734                | 2.240559  | 0.214635  |
| 29               | 6                | 0              | -1.776360               | 4.733517  | -2.088116 |
| 30               | 1                | 0              | -3.030861               | 3.061310  | -2.610784 |
| 31               | 6                | 0              | -0.665405               | 5.171411  | -1.344882 |
| 32               | 1                | 0              | 0.874900                | 4.595015  | 0.057311  |
| 33               | 1                | 0              | -2.319828               | 5.427868  | -2.721465 |
| 34               | 1                | 0              | -0.344104               | 6.207478  | -1.400735 |
| 35               | 8                | 0              | -1.510780               | -3.766759 | -1.045112 |
| 36               | 1                | 0              | -2.187963               | -1.443448 | -2.244828 |
| 37               | 1                | 0              | -2.568976               | 0.921840  | -2.141722 |
| 38               | 6                | 0              | -3.185487               | -0.950437 | -0.365032 |
| 39               | 6                | 0              | -3.026182               | 0.572129  | -0.095096 |
| 40               | 1                | 0              | -4.082817               | -1.220113 | -0.922986 |
| 41               | 1                | 0              | -3.967028               | 1.127332  | -0.150096 |
| 42               | 7                | 0              | -2.753988               | -0.646975 | 1.939210  |
| 43               | 6                | 0              | -2.533213               | -0.939697 | 3.362875  |
| 44               | 1                | 0              | -3.018118               | -0.177517 | 3.978003  |
| 45               | 1                | 0              | -2.960176               | -1.921747 | 3.575725  |
| 46               | 1                | 0              | -1.462415               | -0.956547 | 3.590672  |
| 47               | 6                | 0              | -3.217412               | -1.595654 | 1.018624  |
| 48               | 8                | 0              | -3.561665               | -2.757603 | 1.293301  |
| 49               | 6                | 0              | -2.507487               | 0.609283  | 1.353742  |
| 50               | 8                | 0              | -1.963407               | 1.549505  | 1.958979  |
| 51               | 6                | 0              | -2.863598               | -4.061999 | -1.571492 |
| 52               | 1                | 0              | -2.824664               | -5.117368 | -1.834439 |
| 53               | 1                | 0              | -3.591288               | -3.887345 | -0.777013 |
| 54               | 1                | 0              | -3.075810               | -3.465716 | -2.465289 |
| 55               | 29               | 0              | 0.750042                | -0.227529 | -0.516947 |

### exo-P-(Cu-bipym)

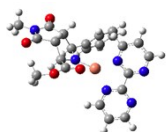

| Center<br>Number | Atomic<br>Number | Atomic<br>Type | Coordinates (Angstroms) |   |   |
|------------------|------------------|----------------|-------------------------|---|---|
|                  |                  |                | X                       | Y | Z |

|    |    |   |           |           |           |
|----|----|---|-----------|-----------|-----------|
| 1  | 6  | 0 | 3.872712  | -0.711068 | -0.442867 |
| 2  | 6  | 0 | 5.143992  | -1.909544 | -1.949860 |
| 3  | 6  | 0 | 3.987046  | -2.276677 | -2.663163 |
| 4  | 1  | 0 | 6.131631  | -2.239523 | -2.253760 |
| 5  | 6  | 0 | 2.758009  | -1.800161 | -2.182586 |
| 6  | 1  | 0 | 4.038096  | -2.899844 | -3.546919 |
| 7  | 1  | 0 | 1.821264  | -2.035706 | -2.672759 |
| 8  | 6  | 0 | 3.738000  | 0.121313  | 0.786109  |
| 9  | 6  | 0 | 4.660707  | 1.237713  | 2.583175  |
| 10 | 6  | 0 | 3.377591  | 1.569335  | 3.057786  |
| 11 | 1  | 0 | 5.561886  | 1.543664  | 3.104136  |
| 12 | 6  | 0 | 2.280598  | 1.133584  | 2.298479  |
| 13 | 1  | 0 | 3.237658  | 2.138875  | 3.968146  |
| 14 | 1  | 0 | 1.262266  | 1.347219  | 2.595497  |
| 15 | 7  | 0 | 4.839233  | 0.513824  | 1.450495  |
| 16 | 7  | 0 | 2.455585  | 0.415013  | 1.162214  |
| 17 | 7  | 0 | 5.087289  | -1.127412 | -0.842869 |
| 18 | 7  | 0 | 2.699863  | -1.018962 | -1.075360 |
| 19 | 7  | 0 | -0.818929 | -0.259336 | -0.412535 |
| 20 | 6  | 0 | -1.703646 | -1.391608 | -0.036557 |
| 21 | 6  | 0 | -0.840488 | -2.507795 | 0.584603  |
| 22 | 8  | 0 | 0.314209  | -2.240498 | 0.989469  |
| 23 | 6  | 0 | -1.721014 | 0.896667  | -0.675494 |
| 24 | 6  | 0 | -1.002758 | 2.224880  | -0.799729 |
| 25 | 6  | 0 | -0.302416 | 2.772504  | 0.296148  |
| 26 | 6  | 0 | -1.035930 | 2.940502  | -2.012110 |
| 27 | 6  | 0 | 0.356416  | 4.006707  | 0.182325  |
| 28 | 1  | 0 | -0.296268 | 2.247137  | 1.248848  |
| 29 | 6  | 0 | -0.381133 | 4.180012  | -2.130540 |
| 30 | 1  | 0 | -1.583002 | 2.540283  | -2.862225 |
| 31 | 6  | 0 | 0.317755  | 4.716141  | -1.033922 |
| 32 | 1  | 0 | 0.881881  | 4.422992  | 1.037176  |
| 33 | 1  | 0 | -0.427115 | 4.727179  | -3.067276 |
| 34 | 8  | 0 | -1.269567 | -3.782638 | 0.648082  |
| 35 | 6  | 0 | -2.521732 | -4.311575 | 0.043515  |
| 36 | 1  | 0 | -2.481414 | -5.377748 | 0.258340  |
| 37 | 1  | 0 | -3.396668 | -3.849174 | 0.501862  |
| 38 | 1  | 0 | -2.509382 | -4.149921 | -1.040396 |
| 39 | 1  | 0 | -2.200539 | -1.788704 | -0.936438 |
| 40 | 1  | 0 | -2.261113 | 0.703490  | -1.617785 |
| 41 | 6  | 0 | -2.799816 | -0.720639 | 0.886871  |
| 42 | 6  | 0 | -2.744729 | 0.787279  | 0.516547  |
| 43 | 1  | 0 | -2.583038 | -0.907338 | 1.941984  |
| 44 | 1  | 0 | -2.418259 | 1.421917  | 1.341820  |
| 45 | 7  | 0 | -4.957168 | -0.013079 | 0.163609  |
| 46 | 6  | 0 | -6.381418 | -0.039204 | -0.205620 |
| 47 | 1  | 0 | -6.496346 | 0.070188  | -1.288827 |
| 48 | 1  | 0 | -6.798951 | -0.996678 | 0.111704  |
| 49 | 1  | 0 | -6.903432 | 0.785359  | 0.285448  |
| 50 | 6  | 0 | -4.250636 | -1.134851 | 0.599959  |
| 51 | 8  | 0 | -4.738265 | -2.273140 | 0.728561  |
| 52 | 6  | 0 | -4.172549 | 1.160709  | 0.122236  |
| 53 | 8  | 0 | -4.599693 | 2.274757  | -0.206011 |
| 54 | 1  | 0 | 0.815298  | 5.677124  | -1.119863 |
| 55 | 29 | 0 | 1.034607  | -0.360149 | -0.115181 |

### endo-TS-(Cu-bipym)

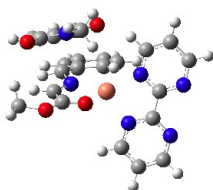

| Center Number | Atomic Number | Atomic Type | Coordinates (Angstroms) |   |   |
|---------------|---------------|-------------|-------------------------|---|---|
|               |               |             | X                       | Y | Z |

|    |    |   |           |           |           |
|----|----|---|-----------|-----------|-----------|
| 1  | 6  | 0 | 3.556374  | -0.564156 | -0.274827 |
| 2  | 6  | 0 | 5.091734  | -1.444402 | -1.757437 |
| 3  | 6  | 0 | 4.074793  | -1.667879 | -2.704643 |
| 4  | 1  | 0 | 6.126620  | -1.702510 | -1.955734 |
| 5  | 6  | 0 | 2.771621  | -1.287131 | -2.347434 |
| 6  | 1  | 0 | 4.286161  | -2.114184 | -3.668637 |
| 7  | 1  | 0 | 1.933265  | -1.433240 | -3.017954 |
| 8  | 6  | 0 | 3.220988  | 0.010833  | 1.060621  |
| 9  | 6  | 0 | 3.873806  | 0.776009  | 3.140263  |
| 10 | 6  | 0 | 2.537404  | 1.056088  | 3.475164  |
| 11 | 1  | 0 | 4.690191  | 0.962831  | 3.829609  |
| 12 | 6  | 0 | 1.554140  | 0.773179  | 2.513032  |
| 13 | 1  | 0 | 2.267498  | 1.476566  | 4.435975  |
| 14 | 1  | 0 | 0.501961  | 0.975107  | 2.680981  |
| 15 | 7  | 0 | 4.215059  | 0.259737  | 1.933597  |
| 16 | 7  | 0 | 1.892900  | 0.243575  | 1.305279  |
| 17 | 7  | 0 | 4.833068  | -0.900930 | -0.543495 |
| 18 | 7  | 0 | 2.510780  | -0.724272 | -1.140776 |
| 19 | 7  | 0 | -1.237454 | -0.125856 | -0.957272 |
| 20 | 6  | 0 | -1.828187 | -1.278677 | -1.236842 |
| 21 | 6  | 0 | -1.103818 | -2.526769 | -0.895238 |
| 22 | 8  | 0 | 0.039352  | -2.452976 | -0.376976 |
| 23 | 6  | 0 | -2.016383 | 1.047739  | -1.173608 |
| 24 | 6  | 0 | -1.418203 | 2.391328  | -1.264548 |
| 25 | 6  | 0 | -0.203239 | 2.772661  | -0.643589 |
| 26 | 6  | 0 | -2.149800 | 3.367865  | -1.993065 |
| 27 | 6  | 0 | 0.271545  | 4.085604  | -0.769786 |
| 28 | 1  | 0 | 0.356308  | 2.057052  | -0.049749 |
| 29 | 6  | 0 | -1.676203 | 4.680077  | -2.112655 |
| 30 | 1  | 0 | -3.088952 | 3.093237  | -2.468395 |
| 31 | 6  | 0 | -0.459006 | 5.043605  | -1.500890 |
| 32 | 1  | 0 | 1.203231  | 4.371760  | -0.291762 |
| 33 | 1  | 0 | -2.243898 | 5.413170  | -2.677048 |
| 34 | 1  | 0 | -0.088231 | 6.060635  | -1.588594 |
| 35 | 8  | 0 | -1.654621 | -3.734727 | -1.148943 |
| 36 | 1  | 0 | -2.813305 | -1.319541 | -1.694898 |
| 37 | 1  | 0 | -2.845895 | 0.903495  | -1.870498 |
| 38 | 6  | 0 | -4.182184 | 0.030381  | 0.336912  |
| 39 | 6  | 0 | -3.243496 | 1.080836  | 0.473906  |
| 40 | 1  | 0 | -5.083772 | 0.015821  | -0.260090 |
| 41 | 1  | 0 | -3.493944 | 2.127846  | 0.355469  |
| 42 | 7  | 0 | -2.642871 | -0.652395 | 1.930046  |
| 43 | 6  | 0 | -1.945807 | -1.461707 | 2.935145  |
| 44 | 1  | 0 | -1.792040 | -0.868190 | 3.839968  |
| 45 | 1  | 0 | -2.568172 | -2.328470 | 3.165360  |
| 46 | 1  | 0 | -0.976944 | -1.808225 | 2.558954  |
| 47 | 6  | 0 | -3.752576 | -1.113672 | 1.161756  |
| 48 | 8  | 0 | -4.224497 | -2.270602 | 1.217937  |
| 49 | 6  | 0 | -2.329253 | 0.672618  | 1.615272  |
| 50 | 8  | 0 | -1.439501 | 1.353259  | 2.164681  |
| 51 | 6  | 0 | -3.057011 | -3.913400 | -1.597823 |
| 52 | 1  | 0 | -3.163184 | -4.990575 | -1.711454 |
| 53 | 1  | 0 | -3.741527 | -3.544052 | -0.828743 |
| 54 | 1  | 0 | -3.217727 | -3.424011 | -2.564340 |
| 55 | 29 | 0 | 0.671127  | -0.309288 | -0.255234 |

### exo-TS-(Cu-bipym)

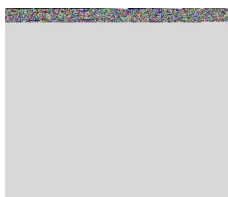

| Center Number | Atomic Number | Atomic Type | Coordinates (Angstroms) |           |           |
|---------------|---------------|-------------|-------------------------|-----------|-----------|
|               |               |             | X                       | Y         | Z         |
| 1             | 6             | 0           | 3.949671                | -0.545982 | -0.514195 |

|    |    |   |           |           |           |
|----|----|---|-----------|-----------|-----------|
| 2  | 6  | 0 | 5.167245  | -1.701932 | -2.098031 |
| 3  | 6  | 0 | 3.980304  | -2.138627 | -2.716908 |
| 4  | 1  | 0 | 6.144738  | -1.987032 | -2.472130 |
| 5  | 6  | 0 | 2.768621  | -1.710289 | -2.152872 |
| 6  | 1  | 0 | 3.996883  | -2.776389 | -3.591956 |
| 7  | 1  | 0 | 1.811312  | -2.003452 | -2.567176 |
| 8  | 6  | 0 | 3.876063  | 0.284822  | 0.723205  |
| 9  | 6  | 0 | 4.906499  | 1.509991  | 2.391033  |
| 10 | 6  | 0 | 3.666063  | 1.730626  | 3.019438  |
| 11 | 1  | 0 | 5.832446  | 1.904422  | 2.796600  |
| 12 | 6  | 0 | 2.531526  | 1.180651  | 2.405661  |
| 13 | 1  | 0 | 3.585441  | 2.299265  | 3.937185  |
| 14 | 1  | 0 | 1.543415  | 1.303032  | 2.832445  |
| 15 | 7  | 0 | 5.008991  | 0.789943  | 1.247802  |
| 16 | 7  | 0 | 2.626054  | 0.461006  | 1.257474  |
| 17 | 7  | 0 | 5.153287  | -0.909035 | -0.997905 |
| 18 | 7  | 0 | 2.750468  | -0.911515 | -1.057254 |
| 19 | 7  | 0 | -0.859408 | -0.431598 | -0.239370 |
| 20 | 6  | 0 | -1.409949 | -1.634826 | -0.199828 |
| 21 | 6  | 0 | -0.573767 | -2.757877 | 0.288402  |
| 22 | 8  | 0 | 0.624173  | -2.544322 | 0.608082  |
| 23 | 6  | 0 | -1.685808 | 0.653902  | -0.657452 |
| 24 | 6  | 0 | -1.094129 | 1.990880  | -0.836524 |
| 25 | 6  | 0 | -0.114918 | 2.495390  | 0.056512  |
| 26 | 6  | 0 | -1.555854 | 2.821734  | -1.887629 |
| 27 | 6  | 0 | 0.412144  | 3.779849  | -0.116520 |
| 28 | 1  | 0 | 0.208121  | 1.886198  | 0.895621  |
| 29 | 6  | 0 | -1.017189 | 4.105568  | -2.067138 |
| 30 | 1  | 0 | -2.333874 | 2.467231  | -2.556870 |
| 31 | 6  | 0 | -0.030496 | 4.587307  | -1.186127 |
| 32 | 1  | 0 | 1.155409  | 4.160615  | 0.577360  |
| 33 | 1  | 0 | -1.371718 | 4.732224  | -2.879240 |
| 34 | 8  | 0 | -1.085571 | -4.007324 | 0.380907  |
| 35 | 6  | 0 | -2.492797 | -4.339459 | 0.042258  |
| 36 | 1  | 0 | -2.574022 | -5.400765 | 0.269082  |
| 37 | 1  | 0 | -3.193274 | -3.768208 | 0.659290  |
| 38 | 1  | 0 | -2.672267 | -4.174776 | -1.025906 |
| 39 | 1  | 0 | -2.420384 | -1.819907 | -0.551826 |
| 40 | 1  | 0 | -2.434118 | 0.381680  | -1.406719 |
| 41 | 6  | 0 | -3.288910 | -0.317227 | 1.539512  |
| 42 | 6  | 0 | -3.048838 | 0.909588  | 0.885594  |
| 43 | 1  | 0 | -2.712817 | -0.785158 | 2.323742  |
| 44 | 1  | 0 | -2.512745 | 1.734752  | 1.338549  |
| 45 | 7  | 0 | -5.113664 | 0.047209  | 0.156216  |
| 46 | 6  | 0 | -6.421307 | -0.099496 | -0.494495 |
| 47 | 1  | 0 | -6.344452 | 0.096968  | -1.567705 |
| 48 | 1  | 0 | -6.766368 | -1.122721 | -0.328303 |
| 49 | 1  | 0 | -7.139404 | 0.602971  | -0.060532 |
| 50 | 6  | 0 | -4.524725 | -0.928223 | 0.996898  |
| 51 | 8  | 0 | -4.968743 | -2.080946 | 1.192671  |
| 52 | 6  | 0 | -4.311126 | 1.204727  | 0.085870  |
| 53 | 8  | 0 | -4.588002 | 2.230642  | -0.555265 |
| 54 | 1  | 0 | 0.378875  | 5.583709  | -1.318871 |
| 55 | 29 | 0 | 1.133583  | -0.410610 | 0.140603  |

### endo-RC-(Cu-Pt-bipym)

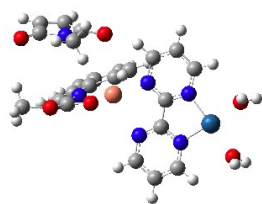

| Center Number | Atomic Number | Atomic Type | Coordinates (Angstroms) |          |          |
|---------------|---------------|-------------|-------------------------|----------|----------|
|               |               |             | X                       | Y        | Z        |
| 1             | 6             | 0           | -1.849569               | 0.271747 | 0.953490 |

|    |    |   |           |           |           |
|----|----|---|-----------|-----------|-----------|
| 2  | 6  | 0 | -3.529823 | 0.442007  | 2.590935  |
| 3  | 6  | 0 | -2.533822 | 0.702653  | 3.545001  |
| 4  | 1  | 0 | -4.580967 | 0.404455  | 2.846359  |
| 5  | 6  | 0 | -1.191234 | 0.743625  | 3.117205  |
| 6  | 1  | 0 | -2.798851 | 0.870906  | 4.581603  |
| 7  | 1  | 0 | -0.381299 | 0.949740  | 3.806785  |
| 8  | 6  | 0 | -1.557451 | -0.012891 | -0.448650 |
| 9  | 6  | 0 | -2.475962 | -0.536562 | -2.552249 |
| 10 | 6  | 0 | -1.175078 | -0.565254 | -3.082134 |
| 11 | 1  | 0 | -3.354574 | -0.723503 | -3.155312 |
| 12 | 6  | 0 | -0.085296 | -0.325402 | -2.232208 |
| 13 | 1  | 0 | -1.014153 | -0.778402 | -4.131258 |
| 14 | 1  | 0 | 0.952150  | -0.379722 | -2.557103 |
| 15 | 7  | 0 | -2.656440 | -0.275184 | -1.229686 |
| 16 | 7  | 0 | -0.288049 | -0.027558 | -0.903359 |
| 17 | 7  | 0 | -3.184098 | 0.222833  | 1.292083  |
| 18 | 7  | 0 | -0.858836 | 0.526477  | 1.815962  |
| 19 | 7  | 0 | 3.061515  | 0.606851  | 1.160170  |
| 20 | 6  | 0 | 3.597501  | -0.458248 | 1.831005  |
| 21 | 6  | 0 | 2.828103  | -1.704440 | 1.843097  |
| 22 | 8  | 0 | 1.667053  | -1.726266 | 1.305669  |
| 23 | 6  | 0 | 3.750642  | 1.768369  | 1.141084  |
| 24 | 6  | 0 | 3.416665  | 2.960644  | 0.415341  |
| 25 | 6  | 0 | 2.352740  | 3.048963  | -0.533764 |
| 26 | 6  | 0 | 4.223547  | 4.118447  | 0.649837  |
| 27 | 6  | 0 | 2.102114  | 4.246799  | -1.202090 |
| 28 | 1  | 0 | 1.759585  | 2.167716  | -0.762855 |
| 29 | 6  | 0 | 3.960250  | 5.319706  | -0.016452 |
| 30 | 1  | 0 | 5.048095  | 4.066240  | 1.356516  |
| 31 | 6  | 0 | 2.898468  | 5.389551  | -0.943048 |
| 32 | 1  | 0 | 1.309441  | 4.306589  | -1.941320 |
| 33 | 1  | 0 | 4.574846  | 6.193474  | 0.171358  |
| 34 | 1  | 0 | 2.697518  | 6.318869  | -1.467251 |
| 35 | 8  | 0 | 3.294333  | -2.830323 | 2.396485  |
| 36 | 1  | 0 | 4.557327  | -0.375953 | 2.334381  |
| 37 | 1  | 0 | 4.667557  | 1.812298  | 1.735950  |
| 38 | 6  | 0 | 6.217148  | -0.777002 | -1.502313 |
| 39 | 6  | 0 | 5.200655  | -0.092335 | -2.073814 |
| 40 | 1  | 0 | 7.254511  | -0.495111 | -1.384033 |
| 41 | 1  | 0 | 5.213432  | 0.882140  | -2.540572 |
| 42 | 7  | 0 | 4.309773  | -2.145792 | -1.422170 |
| 43 | 6  | 0 | 3.456550  | -3.337730 | -1.305872 |
| 44 | 1  | 0 | 3.077635  | -3.619781 | -2.292472 |
| 45 | 1  | 0 | 4.074602  | -4.151061 | -0.919107 |
| 46 | 1  | 0 | 2.619569  | -3.166787 | -0.623120 |
| 47 | 6  | 0 | 5.682061  | -2.099767 | -1.018676 |
| 48 | 8  | 0 | 6.243847  | -2.976030 | -0.350727 |
| 49 | 6  | 0 | 3.955106  | -0.934568 | -2.003066 |
| 50 | 8  | 0 | 2.791968  | -0.609506 | -2.347788 |
| 51 | 6  | 0 | 4.672200  | -2.992559 | 2.947786  |
| 52 | 1  | 0 | 4.667170  | -3.993826 | 3.374240  |
| 53 | 1  | 0 | 5.400080  | -2.931667 | 2.133808  |
| 54 | 1  | 0 | 4.858518  | -2.252674 | 3.731280  |
| 55 | 8  | 0 | -5.591776 | -0.766618 | -1.912602 |
| 56 | 1  | 0 | -6.144913 | -0.135232 | -2.415731 |
| 57 | 8  | 0 | -6.200006 | -0.068186 | 0.883639  |
| 58 | 1  | 0 | -6.739524 | 0.748523  | 0.886285  |
| 59 | 1  | 0 | -5.840013 | -1.698991 | -2.077800 |
| 60 | 1  | 0 | -6.692702 | -0.844272 | 1.219150  |
| 61 | 29 | 0 | 1.217378  | 0.078987  | 0.392027  |
| 62 | 78 | 0 | -4.414263 | -0.218680 | -0.240893 |

---

### exo-RC-(Cu-Pt-bipym)

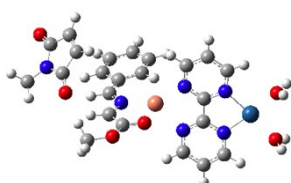

| Center<br>Number | Atomic<br>Number | Atomic<br>Type | Coordinates (Angstroms) |           |           |
|------------------|------------------|----------------|-------------------------|-----------|-----------|
|                  |                  |                | X                       | Y         | Z         |
| 1                | 6                | 0              | 2.275804                | -0.267279 | -0.806221 |
| 2                | 6                | 0              | 3.886333                | -0.871870 | -2.404607 |
| 3                | 6                | 0              | 2.842273                | -1.186817 | -3.291444 |
| 4                | 1                | 0              | 4.928403                | -0.980254 | -2.676439 |
| 5                | 6                | 0              | 1.512416                | -1.003840 | -2.860422 |
| 6                | 1                | 0              | 3.062588                | -1.563636 | -4.283309 |
| 7                | 1                | 0              | 0.669634                | -1.228595 | -3.503955 |
| 8                | 6                | 0              | 2.036028                | 0.185297  | 0.554929  |
| 9                | 6                | 0              | 3.015754                | 0.804191  | 2.600109  |
| 10               | 6                | 0              | 1.723902                | 0.957143  | 3.141177  |
| 11               | 1                | 0              | 3.913158                | 0.983847  | 3.176318  |
| 12               | 6                | 0              | 0.616087                | 0.702216  | 2.320939  |
| 13               | 1                | 0              | 1.595808                | 1.264163  | 4.172331  |
| 14               | 1                | 0              | -0.398068               | 0.802140  | 2.687728  |
| 15               | 7                | 0              | 3.159945                | 0.413147  | 1.307692  |
| 16               | 7                | 0              | 0.771787                | 0.318500  | 1.011839  |
| 17               | 7                | 0              | 3.598624                | -0.413073 | -1.155041 |
| 18               | 7                | 0              | 1.237981                | -0.536198 | -1.610627 |
| 19               | 7                | 0              | -2.643054               | -0.398845 | -0.770595 |
| 20               | 6                | 0              | -3.113038               | -1.682063 | -0.699313 |
| 21               | 6                | 0              | -2.169156               | -2.725785 | -0.291877 |
| 22               | 8                | 0              | -0.951697               | -2.402042 | -0.036764 |
| 23               | 6                | 0              | -3.489257               | 0.574207  | -1.171803 |
| 24               | 6                | 0              | -3.215569               | 1.980838  | -1.272240 |
| 25               | 6                | 0              | -1.988903               | 2.597282  | -0.881047 |
| 26               | 6                | 0              | -4.262494               | 2.808467  | -1.783367 |
| 27               | 6                | 0              | -1.829101               | 3.978654  | -0.985368 |
| 28               | 1                | 0              | -1.180542               | 1.987549  | -0.483868 |
| 29               | 6                | 0              | -4.092913               | 4.192297  | -1.896596 |
| 30               | 1                | 0              | -5.202287               | 2.355984  | -2.086893 |
| 31               | 6                | 0              | -2.878715               | 4.782827  | -1.492482 |
| 32               | 1                | 0              | -0.903163               | 4.452910  | -0.675358 |
| 33               | 1                | 0              | -4.892515               | 4.809425  | -2.290996 |
| 34               | 8                | 0              | -2.527573               | -4.002025 | -0.181015 |
| 35               | 6                | 0              | -3.908178               | -4.511370 | -0.474479 |
| 36               | 1                | 0              | -3.863152               | -5.555898 | -0.174912 |
| 37               | 1                | 0              | -4.641283               | -3.959952 | 0.118166  |
| 38               | 1                | 0              | -4.093954               | -4.432232 | -1.549833 |
| 39               | 1                | 0              | -4.152401               | -1.915983 | -0.905692 |
| 40               | 1                | 0              | -4.498833               | 0.266924  | -1.457151 |
| 41               | 6                | 0              | -5.784898               | -0.416878 | 2.342287  |
| 42               | 6                | 0              | -6.449040               | 0.756804  | 2.421182  |
| 43               | 1                | 0              | -5.027647               | -0.823334 | 2.998373  |
| 44               | 1                | 0              | -6.357895               | 1.553674  | 3.145622  |
| 45               | 7                | 0              | -7.325340               | -0.423816 | 0.591737  |
| 46               | 6                | 0              | -8.242711               | -0.859880 | -0.473639 |
| 47               | 1                | 0              | -8.251202               | -0.141983 | -1.297035 |
| 48               | 1                | 0              | -7.915183               | -1.838185 | -0.831936 |
| 49               | 1                | 0              | -9.258914               | -0.947403 | -0.079713 |
| 50               | 6                | 0              | -6.295218               | -1.181167 | 1.147982  |
| 51               | 8                | 0              | -5.841642               | -2.258031 | 0.691693  |
| 52               | 6                | 0              | -7.446071               | 0.814392  | 1.289869  |
| 53               | 8                | 0              | -8.205762               | 1.737232  | 0.976791  |
| 54               | 1                | 0              | -2.747682               | 5.857472  | -1.566674 |
| 55               | 8                | 0              | 6.632131                | -0.293388 | -0.813230 |
| 56               | 1                | 0              | 7.145709                | -1.121976 | -0.725375 |
| 57               | 8                | 0              | 6.129131                | 0.643366  | 1.935236  |
| 58               | 1                | 0              | 6.534136                | 1.531771  | 2.004878  |
| 59               | 1                | 0              | 7.138174                | 0.417217  | -1.256372 |
| 60               | 1                | 0              | 6.566614                | -0.016453 | 2.511274  |
| 61               | 78               | 0              | 4.888409                | 0.087435  | 0.314525  |
| 62               | 29               | 0              | -0.669024               | -0.388345 | -0.203802 |

endo-P-(Cu-Pt-bipym)



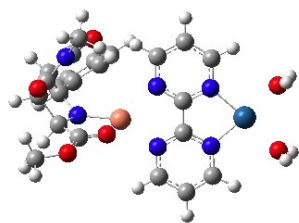

| Center<br>Number | Atomic<br>Number | Atomic<br>Type | Coordinates (Angstroms) |           |           |
|------------------|------------------|----------------|-------------------------|-----------|-----------|
|                  |                  |                | X                       | Y         | Z         |
| 1                | 6                | 0              | 1.706539                | -0.192276 | -0.966679 |
| 2                | 6                | 0              | 3.308091                | -0.780815 | -2.575052 |
| 3                | 6                | 0              | 2.269349                | -0.925039 | -3.511673 |
| 4                | 1                | 0              | 4.346807                | -0.944763 | -2.830574 |
| 5                | 6                | 0              | 0.946609                | -0.673843 | -3.100386 |
| 6                | 1                | 0              | 2.486111                | -1.220953 | -4.531210 |
| 7                | 1                | 0              | 0.108185                | -0.762475 | -3.779535 |
| 8                | 6                | 0              | 1.455669                | 0.197800  | 0.416379  |
| 9                | 6                | 0              | 2.395009                | 0.678121  | 2.508478  |
| 10               | 6                | 0              | 1.099907                | 0.916710  | 2.996533  |
| 11               | 1                | 0              | 3.277094                | 0.771786  | 3.128022  |
| 12               | 6                | 0              | -0.000768               | 0.774953  | 2.124669  |
| 13               | 1                | 0              | 0.950164                | 1.204219  | 4.030921  |
| 14               | 1                | 0              | -1.030828               | 0.938564  | 2.442258  |
| 15               | 7                | 0              | 2.568539                | 0.313190  | 1.205846  |
| 16               | 7                | 0              | 0.197752                | 0.408540  | 0.821063  |
| 17               | 7                | 0              | 3.015981                | -0.418501 | -1.293240 |
| 18               | 7                | 0              | 0.674850                | -0.299801 | -1.816471 |
| 19               | 7                | 0              | -3.090316               | 0.093971  | -1.082256 |
| 20               | 6                | 0              | -3.910610               | -1.152499 | -1.052777 |
| 21               | 6                | 0              | -2.966074               | -2.364735 | -0.918427 |
| 22               | 8                | 0              | -1.749420               | -2.160914 | -0.640522 |
| 23               | 6                | 0              | -4.019590               | 1.191832  | -0.680821 |
| 24               | 6                | 0              | -3.457211               | 2.598772  | -0.713012 |
| 25               | 6                | 0              | -2.398143               | 3.058546  | 0.102224  |
| 26               | 6                | 0              | -4.041303               | 3.496816  | -1.634314 |
| 27               | 6                | 0              | -1.945993               | 4.386728  | -0.003053 |
| 28               | 1                | 0              | -1.990416               | 2.414744  | 0.870961  |
| 29               | 6                | 0              | -3.596739               | 4.826834  | -1.733121 |
| 30               | 1                | 0              | -4.859982               | 3.167031  | -2.270212 |
| 31               | 6                | 0              | -2.545291               | 5.276346  | -0.914193 |
| 32               | 1                | 0              | -1.156884               | 4.745764  | 0.651309  |
| 33               | 1                | 0              | -4.073186               | 5.504628  | -2.433685 |
| 34               | 1                | 0              | -2.213590               | 6.307953  | -0.974108 |
| 35               | 8                | 0              | -3.382367               | -3.601729 | -1.157665 |
| 36               | 1                | 0              | -4.445632               | -1.238320 | -2.010838 |
| 37               | 1                | 0              | -4.839111               | 1.187615  | -1.419532 |
| 38               | 6                | 0              | -5.000883               | -0.913520 | 0.091142  |
| 39               | 6                | 0              | -4.680086               | 0.532382  | 0.578699  |
| 40               | 1                | 0              | -6.007104               | -1.038173 | -0.308740 |
| 41               | 1                | 0              | -5.571354               | 1.085732  | 0.892306  |
| 42               | 7                | 0              | -4.118860               | -1.028031 | 2.285975  |
| 43               | 6                | 0              | -3.717307               | -1.572859 | 3.596453  |
| 44               | 1                | 0              | -3.696106               | -0.764440 | 4.329827  |
| 45               | 1                | 0              | -4.453879               | -2.322675 | 3.893007  |
| 46               | 1                | 0              | -2.734501               | -2.052137 | 3.539415  |
| 47               | 6                | 0              | -4.823103               | -1.787706 | 1.331961  |
| 48               | 8                | 0              | -5.183078               | -2.961180 | 1.481699  |
| 49               | 6                | 0              | -3.815491               | 0.257557  | 1.830436  |
| 50               | 8                | 0              | -2.968602               | 0.996282  | 2.374831  |
| 51               | 6                | 0              | -4.785017               | -4.004552 | -1.491913 |
| 52               | 1                | 0              | -4.690473               | -5.042151 | -1.805091 |
| 53               | 1                | 0              | -5.391148               | -3.922607 | -0.588248 |
| 54               | 1                | 0              | -5.163588               | -3.393139 | -2.317043 |
| 55               | 8                | 0              | 5.519815                | 0.184358  | 1.936708  |
| 56               | 1                | 0              | 6.019195                | 1.016923  | 2.061354  |
| 57               | 8                | 0              | 6.018367                | -0.678656 | -0.837899 |
| 58               | 1                | 0              | 6.655398                | -0.014913 | -1.173035 |
| 59               | 1                | 0              | 5.843243                | -0.539313 | 2.511197  |
| 60               | 1                | 0              | 6.395204                | -1.581894 | -0.811574 |
| 61               | 29               | 0              | -1.177626               | -0.088739 | -0.853342 |

62 78 0 4.291652 -0.148689 0.254575

### exo-P-(Cu-Pt-bipym)

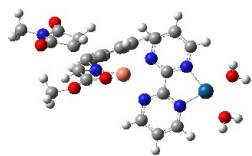

| Center Number | Atomic Number | Atomic Type | Coordinates (Angstroms) |           |           |
|---------------|---------------|-------------|-------------------------|-----------|-----------|
|               |               |             | X                       | Y         | Z         |
| 1             | 6             | 0           | -2.010006               | -0.294969 | 0.743414  |
| 2             | 6             | 0           | -3.460755               | -0.769718 | 2.505119  |
| 3             | 6             | 0           | -2.344574               | -1.058379 | 3.313322  |
| 4             | 1             | 0           | -4.468377               | -0.812690 | 2.889546  |
| 5             | 6             | 0           | -1.057424               | -0.915748 | 2.764093  |
| 6             | 1             | 0           | -2.483271               | -1.366317 | 4.343970  |
| 7             | 1             | 0           | -0.162791               | -1.106057 | 3.343657  |
| 8             | 6             | 0           | -1.882647               | 0.076729  | -0.665692 |
| 9             | 6             | 0           | -2.983657               | 0.643288  | -2.646450 |
| 10            | 6             | 0           | -1.731978               | 0.756720  | -3.277551 |
| 11            | 1             | 0           | -3.901376               | 0.843916  | -3.179086 |
| 12            | 6             | 0           | -0.573942               | 0.505991  | -2.525257 |
| 13            | 1             | 0           | -1.667441               | 1.033036  | -4.323723 |
| 14            | 1             | 0           | 0.414271                | 0.568920  | -2.964661 |
| 15            | 7             | 0           | -3.055598               | 0.287432  | -1.331771 |
| 16            | 7             | 0           | -0.659597               | 0.174007  | -1.200289 |
| 17            | 7             | 0           | -3.288789               | -0.403256 | 1.205595  |
| 18            | 7             | 0           | -0.900219               | -0.509966 | 1.464253  |
| 19            | 7             | 0           | 2.759212                | -0.159256 | 0.634099  |
| 20            | 6             | 0           | 3.567589                | -1.407341 | 0.399739  |
| 21            | 6             | 0           | 2.641594                | -2.597736 | 0.245594  |
| 22            | 8             | 0           | 1.456746                | -2.362597 | -0.138191 |
| 23            | 6             | 0           | 3.785143                | 0.921415  | 0.651957  |
| 24            | 6             | 0           | 3.291789                | 2.341120  | 0.816247  |
| 25            | 6             | 0           | 2.203109                | 2.852332  | 0.070303  |
| 26            | 6             | 0           | 3.992925                | 3.206988  | 1.686134  |
| 27            | 6             | 0           | 1.823138                | 4.199299  | 0.197545  |
| 28            | 1             | 0           | 1.668144                | 2.207041  | -0.629001 |
| 29            | 6             | 0           | 3.612219                | 4.554140  | 1.816741  |
| 30            | 1             | 0           | 4.846659                | 2.838318  | 2.249084  |
| 31            | 6             | 0           | 2.525906                | 5.053074  | 1.074511  |
| 32            | 1             | 0           | 1.004032                | 4.603303  | -0.391379 |
| 33            | 1             | 0           | 4.162270                | 5.212819  | 2.480738  |
| 34            | 8             | 0           | 3.023064                | -3.844295 | 0.469383  |
| 35            | 6             | 0           | 4.340338                | -4.278428 | 1.053275  |
| 36            | 1             | 0           | 4.287854                | -5.367367 | 1.046655  |
| 37            | 1             | 0           | 5.152014                | -3.938107 | 0.410429  |
| 38            | 1             | 0           | 4.411630                | -3.912094 | 2.074325  |
| 39            | 1             | 0           | 4.332588                | -1.538616 | 1.163285  |
| 40            | 1             | 0           | 4.560204                | 0.704212  | 1.402152  |
| 41            | 6             | 0           | 4.330621                | -0.946853 | -0.995549 |
| 42            | 6             | 0           | 4.473732                | 0.591265  | -0.812244 |
| 43            | 1             | 0           | 3.676383                | -1.298582 | -1.796240 |
| 44            | 1             | 0           | 3.954456                | 1.228078  | -1.522861 |
| 45            | 7             | 0           | 6.621032                | -0.443016 | -0.839892 |
| 46            | 6             | 0           | 8.087422                | -0.599964 | -0.793629 |
| 47            | 1             | 0           | 8.489265                | -0.023091 | 0.039829  |
| 48            | 1             | 0           | 8.300961                | -1.658953 | -0.667774 |
| 49            | 1             | 0           | 8.543093                | -0.242520 | -1.721212 |
| 50            | 6             | 0           | 5.746935                | -1.503301 | -1.068354 |
| 51            | 8             | 0           | 6.044707                | -2.695168 | -1.229978 |
| 52            | 6             | 0           | 5.990367                | 0.823266  | -0.785852 |
| 53            | 8             | 0           | 6.573420                | 1.908252  | -0.721174 |
| 54            | 1             | 0           | 2.236986                | 6.099226  | 1.168337  |
| 55            | 8             | 0           | -6.393901               | -0.401239 | 1.027723  |

|    |    |   |           |           |           |
|----|----|---|-----------|-----------|-----------|
| 56 | 1  | 0 | -6.614712 | -1.267461 | 1.428097  |
| 57 | 8  | 0 | -6.191250 | 0.308602  | -1.659826 |
| 58 | 1  | 0 | -7.016911 | 0.796845  | -1.437154 |
| 59 | 1  | 0 | -7.108347 | 0.258133  | 1.174247  |
| 60 | 1  | 0 | -6.178925 | 0.004003  | -2.591699 |
| 61 | 78 | 0 | -4.711433 | -0.034324 | -0.193394 |
| 62 | 29 | 0 | 0.841775  | -0.346136 | 0.240801  |

### endo-TS-(Cu-Pt-bipym)

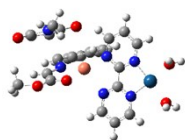

| Center Number | Atomic Number | Atomic Type | Coordinates (Angstroms) |           |           |
|---------------|---------------|-------------|-------------------------|-----------|-----------|
|               |               |             | X                       | Y         | Z         |
| 1             | 6             | 0           | 1.779549                | -0.183752 | -0.953937 |
| 2             | 6             | 0           | 3.384164                | -0.815098 | -2.546414 |
| 3             | 6             | 0           | 2.343384                | -1.017026 | -3.468481 |
| 4             | 1             | 0           | 4.423293                | -0.980706 | -2.799982 |
| 5             | 6             | 0           | 1.020243                | -0.754758 | -3.058663 |
| 6             | 1             | 0           | 2.561540                | -1.358608 | -4.473112 |
| 7             | 1             | 0           | 0.178439                | -0.878187 | -3.728984 |
| 8             | 6             | 0           | 1.537372                | 0.197685  | 0.435539  |
| 9             | 6             | 0           | 2.511549                | 0.700827  | 2.513185  |
| 10            | 6             | 0           | 1.222778                | 0.898285  | 3.036051  |
| 11            | 1             | 0           | 3.406657                | 0.821945  | 3.108861  |
| 12            | 6             | 0           | 0.107487                | 0.710840  | 2.200918  |
| 13            | 1             | 0           | 1.090757                | 1.187649  | 4.071199  |
| 14            | 1             | 0           | -0.923745               | 0.831117  | 2.533132  |
| 15            | 7             | 0           | 2.659915                | 0.338912  | 1.208214  |
| 16            | 7             | 0           | 0.279862                | 0.358533  | 0.883786  |
| 17            | 7             | 0           | 3.096456                | -0.398498 | -1.281350 |
| 18            | 7             | 0           | 0.750768                | -0.327927 | -1.794280 |
| 19            | 7             | 0           | -3.217336               | -0.083647 | -0.912552 |
| 20            | 6             | 0           | -3.688385               | -1.274297 | -1.236964 |
| 21            | 6             | 0           | -2.746458               | -2.429164 | -1.140090 |
| 22            | 8             | 0           | -1.531253               | -2.199149 | -0.856290 |
| 23            | 6             | 0           | -4.116320               | 1.016564  | -0.871427 |
| 24            | 6             | 0           | -3.623179               | 2.406462  | -0.953129 |
| 25            | 6             | 0           | -2.415249               | 2.848593  | -0.356120 |
| 26            | 6             | 0           | -4.440449               | 3.353334  | -1.624843 |
| 27            | 6             | 0           | -2.033658               | 4.192830  | -0.441778 |
| 28            | 1             | 0           | -1.814293               | 2.157277  | 0.226301  |
| 29            | 6             | 0           | -4.053314               | 4.699230  | -1.712600 |
| 30            | 1             | 0           | -5.374559               | 3.038573  | -2.083379 |
| 31            | 6             | 0           | -2.848722               | 5.124532  | -1.118856 |
| 32            | 1             | 0           | -1.120061               | 4.531149  | 0.037797  |
| 33            | 1             | 0           | -4.684616               | 5.413489  | -2.230809 |
| 34            | 1             | 0           | -2.553682               | 6.167887  | -1.174087 |
| 35            | 8             | 0           | -3.151891               | -3.679863 | -1.352510 |
| 36            | 1             | 0           | -4.711668               | -1.425544 | -1.572877 |
| 37            | 1             | 0           | -5.045309               | 0.856587  | -1.422859 |
| 38            | 6             | 0           | -5.925105               | -0.240098 | 0.877446  |
| 39            | 6             | 0           | -4.958022               | 0.793896  | 0.968273  |
| 40            | 1             | 0           | -6.918852               | -0.188856 | 0.452755  |
| 41            | 1             | 0           | -5.226359               | 1.840998  | 1.047810  |
| 42            | 7             | 0           | -4.156791               | -1.076837 | 2.132668  |
| 43            | 6             | 0           | -3.381592               | -1.963953 | 3.009372  |
| 44            | 1             | 0           | -3.181765               | -1.459825 | 3.959495  |
| 45            | 1             | 0           | -3.976402               | -2.860894 | 3.195098  |
| 46            | 1             | 0           | -2.433512               | -2.256318 | 2.544285  |
| 47            | 6             | 0           | -5.380547               | -1.467806 | 1.484858  |
| 48            | 8             | 0           | -5.817564               | -2.633155 | 1.463793  |
| 49            | 6             | 0           | -3.850936               | 0.247184  | 1.863042  |
| 50            | 8             | 0           | -2.808724               | 0.832131  | 2.245832  |

|    |    |   |           |           |           |
|----|----|---|-----------|-----------|-----------|
| 51 | 6  | 0 | -4.578279 | -4.109255 | -1.528607 |
| 52 | 1  | 0 | -4.509181 | -5.191240 | -1.618410 |
| 53 | 1  | 0 | -5.157977 | -3.836544 | -0.642413 |
| 54 | 1  | 0 | -4.986310 | -3.680038 | -2.447329 |
| 55 | 8  | 0 | 5.624716  | 0.279433  | 1.914303  |
| 56 | 1  | 0 | 6.152486  | 1.094268  | 2.038163  |
| 57 | 8  | 0 | 6.124378  | -0.460301 | -0.896916 |
| 58 | 1  | 0 | 6.655793  | 0.257253  | -1.298338 |
| 59 | 1  | 0 | 5.928312  | -0.454883 | 2.485732  |
| 60 | 1  | 0 | 6.612605  | -1.307032 | -0.848058 |
| 61 | 29 | 0 | -1.208127 | -0.142509 | -0.404173 |
| 62 | 78 | 0 | 4.385113  | -0.058764 | 0.234606  |

### exo-TS-(Cu-Pt-bipym)

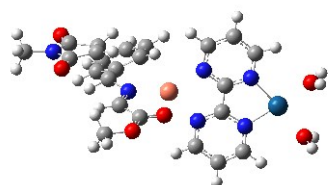

| Center Number | Atomic Number | Atomic Type | Coordinates (Angstroms) |           |           |
|---------------|---------------|-------------|-------------------------|-----------|-----------|
|               |               |             | X                       | Y         | Z         |
| 1             | 6             | 0           | -2.085001               | -0.003354 | 0.774838  |
| 2             | 6             | 0           | -3.574002               | -0.354340 | 2.558993  |
| 3             | 6             | 0           | -2.472907               | -0.408923 | 3.427108  |
| 4             | 1             | 0           | -4.591678               | -0.471427 | 2.907271  |
| 5             | 6             | 0           | -1.178701               | -0.231388 | 2.890728  |
| 6             | 1             | 0           | -2.619995               | -0.576693 | 4.486643  |
| 7             | 1             | 0           | -0.299004               | -0.245373 | 3.522008  |
| 8             | 6             | 0           | -1.942128               | 0.160812  | -0.657492 |
| 9             | 6             | 0           | -3.053917               | 0.339408  | -2.723632 |
| 10            | 6             | 0           | -1.805477               | 0.440787  | -3.355642 |
| 11            | 1             | 0           | -3.986248               | 0.365191  | -3.272152 |
| 12            | 6             | 0           | -0.640144               | 0.381119  | -2.562884 |
| 13            | 1             | 0           | -1.742982               | 0.553995  | -4.430950 |
| 14            | 1             | 0           | 0.346998                | 0.442153  | -3.004615 |
| 15            | 7             | 0           | -3.118060               | 0.198908  | -1.370008 |
| 16            | 7             | 0           | -0.712399               | 0.238623  | -1.210602 |
| 17            | 7             | 0           | -3.377760               | -0.144627 | 1.227285  |
| 18            | 7             | 0           | -0.993141               | -0.026653 | 1.559896  |
| 19            | 7             | 0           | 2.794738                | -0.384770 | 0.549066  |
| 20            | 6             | 0           | 3.114516                | -1.646768 | 0.762694  |
| 21            | 6             | 0           | 2.032237                | -2.669907 | 0.679878  |
| 22            | 8             | 0           | 0.844704                | -2.287789 | 0.458684  |
| 23            | 6             | 0           | 3.857035                | 0.575956  | 0.591714  |
| 24            | 6             | 0           | 3.545239                | 2.006878  | 0.714669  |
| 25            | 6             | 0           | 2.456608                | 2.619999  | 0.035202  |
| 26            | 6             | 0           | 4.417338                | 2.819426  | 1.488291  |
| 27            | 6             | 0           | 2.244286                | 3.998038  | 0.138597  |
| 28            | 1             | 0           | 1.809549                | 2.021008  | -0.605190 |
| 29            | 6             | 0           | 4.186729                | 4.196084  | 1.611433  |
| 30            | 1             | 0           | 5.273304                | 2.374798  | 1.987308  |
| 31            | 6             | 0           | 3.105050                | 4.791744  | 0.934290  |
| 32            | 1             | 0           | 1.435156                | 4.473742  | -0.406897 |
| 33            | 1             | 0           | 4.854987                | 4.803890  | 2.211020  |
| 34            | 8             | 0           | 2.296441                | -3.966767 | 0.846350  |
| 35            | 6             | 0           | 3.657248                | -4.554789 | 1.055035  |
| 36            | 1             | 0           | 3.479876                | -5.626885 | 1.012728  |
| 37            | 1             | 0           | 4.337217                | -4.248664 | 0.254589  |
| 38            | 1             | 0           | 4.029802                | -4.274764 | 2.043503  |
| 39            | 1             | 0           | 4.123979                | -1.951282 | 1.029969  |
| 40            | 1             | 0           | 4.704236                | 0.254909  | 1.204455  |
| 41            | 6             | 0           | 4.822043                | -0.976490 | -1.571710 |
| 42            | 6             | 0           | 4.775678                | 0.382203  | -1.194006 |

|    |    |   |           |           |           |
|----|----|---|-----------|-----------|-----------|
| 43 | 1  | 0 | 4.071176  | -1.561062 | -2.086339 |
| 44 | 1  | 0 | 4.177145  | 1.118975  | -1.718623 |
| 45 | 7  | 0 | 6.951525  | -0.456301 | -0.812657 |
| 46 | 6  | 0 | 8.391960  | -0.554984 | -0.513673 |
| 47 | 1  | 0 | 8.578658  | -0.575282 | 0.564270  |
| 48 | 1  | 0 | 8.772035  | -1.477298 | -0.958008 |
| 49 | 1  | 0 | 8.903070  | 0.308098  | -0.946191 |
| 50 | 6  | 0 | 6.138000  | -1.551909 | -1.184334 |
| 51 | 8  | 0 | 6.457416  | -2.756329 | -1.164661 |
| 52 | 6  | 0 | 6.222192  | 0.748789  | -0.839149 |
| 53 | 8  | 0 | 6.662276  | 1.879363  | -0.596619 |
| 54 | 1  | 0 | 2.941736  | 5.862374  | 1.008534  |
| 55 | 8  | 0 | -6.422270 | -0.208862 | 1.074189  |
| 56 | 1  | 0 | -6.901993 | -1.054858 | 1.180161  |
| 57 | 8  | 0 | -6.135830 | 0.196993  | -1.828999 |
| 58 | 1  | 0 | -6.586156 | 1.040998  | -2.035711 |
| 59 | 1  | 0 | -6.931437 | 0.556633  | 1.408706  |
| 60 | 1  | 0 | -6.571370 | -0.575288 | -2.243951 |
| 61 | 78 | 0 | -4.768781 | 0.007919  | -0.224564 |
| 62 | 29 | 0 | 0.780599  | -0.139141 | 0.211219  |

---

## References.

- 1 a) C. J. Chang, E. L. Diaz, R. W. Woolfenden, M. D. Grant, *J. Org. Chem.*, 1982, **47**, 5318-5321. b) A. L. Webber, S. Masiero, C. Pieraccini, J. Burley, A. S. Tatton, D. Luga, N. T. Pham, P. Spada, P. S. B. Brown, *J. Am. Chem. Soc.*, 2011, **133**, 19777-19795. c) M. Marjaana, D. K. Klika, A. Hakala, J. Arpalahti, *Inorg. Chem.*, 1999, **38**, (3), 571-578.
- 2 L. Forman, J. C. Fettinger, S. Pieraccini, G. Gottarelli, J. T. Davis, *J. Am. Chem. Soc.*, 2000, **122**, 4060-4067.
- 3 S. Yan, C. Zhang, Y. H. Wang, Z. Cao, Z. Zheng, X. P. Hu, *Tetrahedron Letters*, 2013, **54**, 3669-3672.
- 4 J. F. Bai, L. L. Wang, L. Peng, Y. L. Guo, J. N. Ming, F. Y. Wang, X. Y. Xu, L. X. Wang, *Eur. J. Org. Chem.*, 2011, **23**, 4472-4478.
